# Supplementary material
Source: Elsevier journal article supplement (https://publikationen.ub.uni-frankfurt.de/files/79127/mmc2.pdf)
Supplement: mmc2 [file mmc2.pdf]

# THE LANCET

## Supplementary appendix 2

This appendix formed part of the original submission and has been peer reviewed. We post it as supplied by the authors.

Supplement to: Wainberg ZA, Melisi D, Macarulla T, et al. NALIRIFOX versus nab-paclitaxel and gemcitabine in treatment-naive patients with metastatic pancreatic ductal adenocarcinoma (NAPOLI 3): a randomised, open-label, phase 3 trial. *Lancet* 2023; published online Sept 11. [https://doi.org/10.1016/S0140-6736\(23\)01366-1](https://doi.org/10.1016/S0140-6736(23)01366-1).

## SUPPLEMENTARY APPENDIX

### CONTENTS

|                                                                                                                                                                                              |    |
|----------------------------------------------------------------------------------------------------------------------------------------------------------------------------------------------|----|
| NAPOLI-3 Trial Investigator List .....                                                                                                                                                       | 2  |
| Methods .....                                                                                                                                                                                | 10 |
| <i>Inclusion Criteria</i> .....                                                                                                                                                              | 10 |
| General Inclusion Criteria.....                                                                                                                                                              | 10 |
| Disease-Specific Inclusion Criteria.....                                                                                                                                                     | 10 |
| Haematologic, Biochemical, and Organ Function Inclusion Criteria .....                                                                                                                       | 10 |
| <i>Exclusion Criteria</i> .....                                                                                                                                                              | 10 |
| General Exclusion Criteria.....                                                                                                                                                              | 10 |
| Disease-Specific Exclusion Criteria.....                                                                                                                                                     | 11 |
| Haematologic, Biochemical, and Organ Function Exclusion Criteria .....                                                                                                                       | 11 |
| <i>Study Design and Treatment</i> .....                                                                                                                                                      | 13 |
| Discontinuation and Withdrawal .....                                                                                                                                                         | 13 |
| Outcomes .....                                                                                                                                                                               | 13 |
| <i>Statistical analysis</i> .....                                                                                                                                                            | 14 |
| Sample size and power considerations.....                                                                                                                                                    | 14 |
| Primary efficacy analysis.....                                                                                                                                                               | 14 |
| Secondary efficacy analysis.....                                                                                                                                                             | 15 |
| Tables.....                                                                                                                                                                                  | 16 |
| <i>Table S1 (online only). Number of patients recruited and randomised at each participating site.</i> .....                                                                                 | 16 |
| <i>Table S2 (online only). Summary of major protocol deviations (intention-to-treat population).</i> .....                                                                                   | 23 |
| <i>Table S3 (online only). Subsequent therapy (safety population).</i> .....                                                                                                                 | 24 |
| <i>Table S4 (online only). List of anticancer therapies.</i> .....                                                                                                                           | 25 |
| <i>Table S5 (online only). Reasons for exclusion from the per-protocol population.</i> .....                                                                                                 | 26 |
| <i>Table S6 (online only). Treatment-emergent adverse events of any grade occurring in <math>\geq 10\%</math> of patients in either treatment arm (safety population).</i> .....             | 28 |
| <i>Table S7 (online only). Grade <math>\geq 3</math> treatment-emergent adverse events occurring in <math>\geq 2\%</math> of patients in either treatment arm (safety population).</i> ..... | 31 |
| <i>Table S8 (online only). Serious treatment-emergent adverse events of any grade occurring in patients in either treatment arm (safety population).</i> .....                               | 34 |
| References.....                                                                                                                                                                              | 47 |

**NAPOLI-3 TRIAL INVESTIGATOR LIST**

| <b>Country</b>                                | <b>Site Name</b>                                                                  | <b>Principal Investigator</b>    |
|-----------------------------------------------|-----------------------------------------------------------------------------------|----------------------------------|
| <b>Australia</b>                              | Border Medical Oncology                                                           | Craig Underhill                  |
|                                               | Monash Medical Centre                                                             | Andrew Strickland                |
|                                               | Bankstown-Lidcombe Hospital                                                       | Ray Asghari                      |
|                                               | Sir Charles Gairdner Hospital                                                     | Siobhan Ng                       |
|                                               | Fiona Stanley Hospital                                                            | Christopher Lomma                |
|                                               | St John of God Subiaco Hospital                                                   | Andrew Dean                      |
|                                               | Queen Elizabeth Hospital                                                          | Vy Broadbridge                   |
| <b>Austria</b>                                | Ordensklinikum Linz GmbH Barmherzige Schwestern                                   | Andreas Petzer                   |
|                                               | Medizinische Universitaet Wien                                                    | Gerald Prager                    |
|                                               | Uniklinikum Salzburg – Universitaetsklinik fuer Nuklearmedizin und Endokrinologie | Richard Greil                    |
|                                               | Wiener Krankenanstaltenverbund, Wilhelminenspital                                 | Ercan Müldür                     |
|                                               | Medizinische Universitaet Graz                                                    | Armin Gerger                     |
| <b>Belgium</b>                                | Hospital Centre Jolimont                                                          | Alexandre Dermine                |
|                                               | Universitaire Ziekenhuizen Leuven                                                 | Eric Van Cutsem                  |
|                                               | University Hospital Gent                                                          | Karen Geboes                     |
|                                               | ASBL Grand Hôpital de Charleroi (GHdC) – Site Notre Dame                          | Isabelle Sinapi                  |
|                                               | Onze-Lieve-Vrouwziekenhuis                                                        | Koen Hendrickx                   |
|                                               | Universitair Ziekenhuis Antwerpen (UZA)                                           | Marc Peeters                     |
|                                               | University Hospital Mont-Godinne                                                  | Lionel d’Hondt                   |
| <b>Brazil</b>                                 | Instituto Nacional de Câncer (INCA)                                               | Bruno dos Santos Vilhena Pereira |
|                                               | CIP – Centro Integrado de Pesquisas do Hospital de Base de São José do Rio Preto  | Káthia Cristina Abdalla          |
|                                               | Hospital de Caridade de Ijuí                                                      | Fábio Franke                     |
|                                               | ICESP – Instituto do Câncer do Estado de São Paulo                                | Luiz Antonio Senna Leite         |
|                                               | Fundação Pio XII – Hospital de Câncer de Barretos                                 | Arinilda Campos Bragagnoli       |
|                                               | Clinica Neoplasias Litoral                                                        | Giuliano Borges                  |
|                                               | Hospital Alemão Oswaldo Cruz                                                      | Cheng Tzu Yen                    |
|                                               | Irmandade da Santa Casa de Misericórdia de Porto Alegre                           | Katsuki Arima Tiscoski           |
|                                               | IOP – Instituto de Oncologia do Paraná                                            | Luciano Semensato Biela          |
|                                               | Hospital Bruno Born                                                               | Rafael Seewald                   |
| CRIO – Centro Regional Integrado de Oncologia | Eduardo Henrique Cronemberger                                                     |                                  |

|                |                                                                 |                                         |
|----------------|-----------------------------------------------------------------|-----------------------------------------|
|                | CEPON – Centro de Pesquisas Oncológicas                         | Yeni Verônica Nerón                     |
|                | IBCC – Instituto Brasileiro de Controle do Câncer (São Paulo)   | Felipe José Silva Melo Cruz             |
|                | CePclin – Centro de Pesquisas Clínicas de Natal                 | Juliana Florinda de Mendonça Rego       |
|                | Centro de Pesquisa – Instituto COI                              | Fernando Meton de Alencar Câmara Vieira |
| <b>Canada</b>  | Sunnybrook Health Sciences Centre (Odette Cancer Center)        | Michael Raphael                         |
|                | Alberta Health Services Cross Cancer Institute                  | Michael Sawyer                          |
|                | Centre Hospitalier Universitaire de Sherbrooke                  | Frédéric Lemay                          |
|                | Queen Elizabeth II Health Sciences Centre                       | Ravi Ramjeesingh                        |
|                | McGill University Faculty of Medicine – Royal Victoria Hospital | Jamil Asselah                           |
|                | Tom Baker Cancer Centre                                         | Scot Dowden                             |
| <b>Czechia</b> | Fakultní Nemocnice Hradec Králové                               | Stanislav John                          |
|                | Fakultní Thomayerova Nemocnice                                  | Eugen Kubala                            |
|                | Masarykův Onkologický Ústav                                     | Igor Kiss                               |
|                | Department of Oncology, University Hospital Olomouc             | Bohuslav Melichar                       |
|                | Krajská Nemocnice Liberec                                       | Marek Sochor                            |
|                | Fakultní Nemocnice Bulovka                                      | Petra Holečková                         |
| <b>France</b>  | Centre Hospitalier Universitaire de Poitiers                    | Camille Evrard                          |
|                | CHRU de Tours – Hôpital Trousseau                               | Thierry Lecomte                         |
|                | Centre Oscar Lambret                                            | Diane Pannier                           |
|                | Hôpital Privé Jean Mermoz                                       | Pascal Artru                            |
|                | AP-HP Hôpital Saint Louis                                       | Thomas Aparicio                         |
|                | Strasbourg Oncologie Libérale                                   | Louis Marie Dourthe                     |
|                | Hôpital Édouard Herriot – Hospices Civils de Lyon               | Thomas Walter                           |
|                | AP-HP Hôpital Cochin                                            | Romain Coriat                           |
|                | CHU Bordeaux – Hôpital Haut-Lévêque                             | Eric Terrebonne                         |
|                | Centre Antoine Lacassagne                                       | Angélique Saint                         |
|                | Centre Léon Bérard                                              | Christelle De La Fouchardière           |
| <b>Germany</b> | Asklepios Klinik Altona                                         | Dirk Arnold                             |
|                | Klinikum Mannheim                                               | Nadine Schulte                          |
|                | Universitaetsklinikum Ulm                                       | Thomas Seufferlein                      |
|                | Klinikum Esslingen GmbH                                         | Guido Frank Hausner                     |

|                |                                                                |                        |
|----------------|----------------------------------------------------------------|------------------------|
|                | Krankenhaus Nordwest GmbH                                      | Thorsten Götze         |
|                | Universitaetsklinikum Tuebingen                                | Michael Bitzer         |
|                | Martin-Luther-Universitaet Halle-Wittenberg                    | Petra Büchner-Steudel  |
|                | SLK-Kliniken Heilbronn GmbH                                    | Uwe Martens            |
|                | Charité – Universitaetsmedizin Berlin                          | Uwe Pelzer             |
|                | Krankenhaus St. Franziskus – Kliniken Maria Hilf GmbH          | Ullrich Graeven        |
|                | Facharztzentrum Eppendorf                                      | Eray Gökkurt           |
|                | Marienkrankehaus Hamburg                                       | Gunnar Hapke           |
|                | St. Josef-Hospital                                             | Anke Reinacher-Schick  |
|                | Universitaetsklinikum Jena                                     | Udo Lindig             |
|                | Medizinische Hochschule Hannover                               | Arndt Vogel            |
|                | Studiengesellschaft BSF                                        | Norbert Steudel        |
| <b>Greece</b>  | University of Crete                                            | Dimitrios Mavroudis    |
|                | University General Hospital of Ioannina                        | Davide Mauri           |
|                | National and Kapodistrian University of Athens                 | Christos Papadimitriou |
|                | Theagenio Anticancer Hospital of Thessaloniki                  | Pavlos Papakotoulas    |
|                | Agios Savvas Anticancer Hospital                               | Alexandros Ardavanis   |
|                | Eugenideion Therapeutirion Hospital                            | Michalis Karamouzis    |
| <b>Hungary</b> | Jász-Nagykun-Szolnok Megyei Hetényi Géza Kórház-Rendelőintézet | Tibor Csősz            |
|                | Semmelweis Egyetem Belgyógyászati és Hematológiai Klinika      | Júlia Lohinszky        |
|                | Petz Aladár Megyei Oktató Kórház                               | István Sipőcz          |
|                | Országos Onkológiai Intézet                                    | Erika Hitre            |
|                | Debreceni Egyetem Klinikai Központ                             | Péter Árkosy           |
|                | Somogy Megyei Kaposi Mór Oktató Kórház                         | Lukács Gábor           |
|                | Dél-pesti Centrumkórház - Szent László Kórház Telephely        | Bodoky György          |
| <b>Israel</b>  | Hadassah Ein Kerem Medical Center                              | Ayala Hubert           |
|                | Rambam Health Care Campus                                      | Maria Passhak          |
|                | Sheba Medical Center                                           | Talia Golan            |
|                | Soroka Medical Center                                          | Alexander Gluzman      |
|                | Tel Aviv Sourasky Medical Center                               | Ravit Geva             |
| <b>Italy</b>   | AUSL di Piacenza-Ospedale Guglielmo Da Saliceto                | Luigi Cavanna          |
|                | Azienda Ospedaliero-Universitaria di Modena                    | Fabio Gelsomino        |
|                | Istituto Europeo di Oncologia                                  | Nicola Fazio           |

|                    |                                                                                                                                                |                              |
|--------------------|------------------------------------------------------------------------------------------------------------------------------------------------|------------------------------|
|                    | Azienda Ospedaliero-Universitaria Pisana                                                                                                       | Enrico Vasile                |
|                    | Azienda Ospedaliera-Universitaria Integrata Verona-Ospedale Borgo Roma                                                                         | Davide Melisi                |
|                    | IRCCS Azienda Ospedaliero-Universitaria di Bologna-Policlinico di Sant'Orsola-Malpighi                                                         | Giovanni Brandi              |
|                    | IRCCS Istituto Romagnolo per lo Studio dei Tumori Dino Amadori - IRST S.r.l.                                                                   | Giovanni Luca Frassinetti    |
|                    | Azienda Ospedaliero Universitaria-Ospedali Riuniti di Ancona                                                                                   | Rossana Berardi              |
| <b>South Korea</b> | CHA Bundang Medical Center                                                                                                                     | Hong Jae Chon                |
|                    | Seoul National University Hospital                                                                                                             | Do-Youn Oh                   |
|                    | National Cancer Center                                                                                                                         | Woo Jin Lee                  |
|                    | Inje University Haeundae Paik Hospital                                                                                                         | Il Hwan Kim                  |
|                    | Korea University Guro Hospital                                                                                                                 | Sang Cheul Oh                |
|                    | Seoul St. Mary's Hospital, The Catholic University of Korea                                                                                    | Myung-Ah Lee                 |
|                    | Korea University Anam Hospital                                                                                                                 | Yeul Hong Kim                |
|                    | Samsung Medical Center                                                                                                                         | Young Suk Park               |
|                    | Asan Medical Center                                                                                                                            | Baek-Yeol Ryoo               |
| <b>Portugal</b>    | Centro Hospitalar de Vila Nova de Gaia/Espinho, EPE                                                                                            | António Moreira Pinto        |
|                    | Hospital de Braga                                                                                                                              | Ana Daniela Marques          |
|                    | Unidade Local de Saúde Matosinhos, EPE – Hospital Pedro Hispano                                                                                | Alexandra Mesquita Magalhaes |
|                    | Champalimaud Foundation                                                                                                                        | Nuno Couto                   |
|                    | Centro Hospitalar Universitário de Lisboa Norte, EPE – Hospital de Santa Maria                                                                 | Catarina Abreu               |
| <b>Russia</b>      | Federal State Budgetary Institution – The Russian Scientific Center of Radiology and Surgical Technologies named after Academician A.M. Granov | Luiza Korytova               |
|                    | EviMed LLC                                                                                                                                     | Oleg Gladkov                 |
|                    | Kursk Oncological Research and Clinical named after G.E. Ostroverkhov                                                                          | Igor Lifirenko               |
|                    | Clinica Druzhkovykh LLC                                                                                                                        | Ekaterina Amirova            |
|                    | Main Military Clinical Hospital named after N.N. Burdenko                                                                                      | Alexey Smolin                |
|                    | Volga District Medical Centre                                                                                                                  | Anna Alyasova                |
| <b>Spain</b>       | Hospital General Universitario de Elche                                                                                                        | Javier Gallego Plazas        |
|                    | Hospital Universitario Marqués de Valdecilla                                                                                                   | Fernando Rivera Herrero      |

|                       |                                                                                              |                            |
|-----------------------|----------------------------------------------------------------------------------------------|----------------------------|
|                       | Complejo Hospitalario Universitario de Granada – Hospital Universitario Virgen de las Nieves | Joaquina Martínez Galán    |
|                       | Hospital de la Santa Creu i Sant Pau                                                         | Raúl Terés Lleida          |
|                       | Centro Integral Oncológico Clara Campal                                                      | Antonio Cubillo Gracián    |
|                       | Hospital Universitario Vall d'Hebron                                                         | Teresa Macarulla Mercadé   |
|                       | Corporació Sanitària Parc Tauli – Hospital de Sabadell                                       | Ismael Macías Declara      |
|                       | Hospital Regional Universitario de Málaga                                                    | Inmaculada Alés Díaz       |
|                       | Hospital Universitario de Badajoz                                                            | Marta González Cordero     |
|                       | Hospital General Universitario Gregorio Marañón                                              | Andres Muñoz Martín        |
|                       | Hospital Fundación Jiménez Díaz                                                              | Cristina Caramés Sánchez   |
|                       | Hospital Clínic de Barcelona                                                                 | Tamara Saurí Nadal         |
|                       | Hospital Universitario La Paz                                                                | Jaime Feliú Batlle         |
|                       | Hospital Universitario Miguel Servet                                                         | Roberto Pazo Cid           |
|                       | Institut Català d'Oncologia – L'Hospitalet                                                   | Berta Laquente             |
|                       | Complejo Hospitalario de Navarra                                                             | Ruth Vera                  |
|                       | Hospital Germans Trias i Pujol                                                               | Laura Layos Romero         |
|                       | Hospital Universitario 12 de Octubre                                                         | Rocío García Carbonero     |
|                       | Hospital Quirónsalud Barcelona                                                               | José Luis Cuadra           |
| <b>Sweden</b>         | Karolinska University Hospital                                                               | Maria Gustafsson Liljefors |
|                       | Umeå University Hospital (Umeå University Hospital and Norrlands University Hospital)        | Daniel Öhlund              |
| <b>United Kingdom</b> | Cancer Research UK – The Christie NHS Foundation Trust – Department of Medical Oncology      | Richard Hubner             |
|                       | Nottingham City Hospital                                                                     | Arvind Arora               |
|                       | Royal Marsden NHS Foundation Trust                                                           | Ian Chau                   |
|                       | Guy's and St. Thomas' NHS Foundation Trust                                                   | Paul Ross                  |
|                       | Imperial College Healthcare NHS Trust                                                        | Harpreet Wasan             |
| <b>United States</b>  | University of California Los Angeles (UCLA)                                                  | Zev Wainberg               |
|                       | Sarah Cannon and HCA Research Institute                                                      | David Spigel               |
|                       | Carle Foundation Hospital                                                                    | Suparna Mantha             |
|                       | Maine Medical Center                                                                         | Matthew Dugan              |
|                       | New York Cancer and Blood Specialists                                                        | Richard Zuniga             |
|                       | HealthPartners Institute                                                                     | Daniel Anderson            |
|                       | Oncology Hematology West P.C. dba Nebraska Cancer Specialists                                | Nagendra Natarajan         |
|                       | Cancer and Hematology Centers of Western Michigan                                            | Sreenivasa Chandana        |

|                                                                                                                                                    |                    |
|----------------------------------------------------------------------------------------------------------------------------------------------------|--------------------|
| Avera Cancer Institute                                                                                                                             | Heidi McKean       |
| University of Rochester                                                                                                                            | Aram Hezel         |
| Beth Israel Deaconess Medical Center                                                                                                               | Mary Peters        |
| Willis-Knighton Cancer Center                                                                                                                      | Anil Veluvolu      |
| University of Texas Health Science Center at San Antonio                                                                                           | Sukeshi Arora      |
| Mount Sinai Medical Center of Florida, Inc.                                                                                                        | Mike Cusnir        |
| Clinical Research Alliance, Inc                                                                                                                    | Morton Coleman     |
| Kaiser Permanente – Northwest                                                                                                                      | Sandeep Mashru     |
| University of California, Irvine Medical Center                                                                                                    | Farshid Dayyani    |
| University of South Alabama, Division of Clinical Research                                                                                         | Brian Persing      |
| Henry Ford Health System                                                                                                                           | Gazala Khan        |
| University of Alabama at Birmingham                                                                                                                | Grant Williams     |
| Pikeville Medical Center                                                                                                                           | Mohamad Khasawneh  |
| Clearview Cancer Institute                                                                                                                         | Daniel Schreeder   |
| UCHealth Memorial Hospital                                                                                                                         | Robert Hoyer       |
| Froedtert Hospital and the Medical College of Wisconsin                                                                                            | Mandana Kamgar     |
| University of Kentucky, Markey Cancer Center                                                                                                       | Reema Patel        |
| The Center for Cancer and Blood Disorders                                                                                                          | Henry Xiong        |
| The Ohio State University Comprehensive Cancer Center - Arthur G. James Cancer Hospital and Richard J. Solovev Research Institute (OSUCCC – James) | Anne Noonan        |
| David H. Koch Center for Cancer Care at Memorial Sloan Kettering Cancer Center                                                                     | Alice Zervoudakis  |
| Houston Methodist Research Institute                                                                                                               | Maen Abdelrahim    |
| University of Minnesota                                                                                                                            | Edward Greeno      |
| University of Pittsburgh Medical Center (UPMC) Hillman Cancer Center                                                                               | Roby Thomas        |
| Edward Hospital                                                                                                                                    | Alexander Hantel   |
| University of Oklahoma Health Sciences Center                                                                                                      | Hassan Hatoum      |
| Virginia Cancer Specialists                                                                                                                        | Keeran Sampat      |
| The West Cancer Center                                                                                                                             | Bradley G. Somer   |
| Mayo Clinic Scottsdale                                                                                                                             | Tanios Bekaii-Saab |
| City of Hope National Medical Center                                                                                                               | Vincent Chung      |
| Barbara Ann Karmanos Cancer Institute                                                                                                              | Anteneh Tesfaye    |
| Rush University Medical Center                                                                                                                     | Ashiq Masood       |



|                                                                   |                      |
|-------------------------------------------------------------------|----------------------|
| Sutter Health Sacramento                                          | Deepti Behl          |
| Ochsner Medical Center                                            | Suma Satti           |
| Siouxland Hematology-Oncology Associates, LLP                     | Donald Wender        |
| Frontier Cancer Center                                            | Patrick Cobb         |
| Florida Cancer Specialists Panhandle                              | Pareshkumar Patel    |
| Florida Cancer Specialists St. Petersburg                         | Maen Hussein         |
| Florida Cancer Specialists Fort Myers                             | Anjan Patel          |
| Torrance Memorial Physician Network Cancer Care                   | Hugo Hool            |
| Mayo Clinic Jacksonville                                          | Kabir Mody           |
| Comprehensive Cancer Centers of Nevada                            | Brian Vicuna         |
| St. Jude Hospital Yorba Linda dba St. Joseph Heritage Healthcare  | David Park           |
| Summit Cancer Centers North Spokane                               | Arvind Chaudhry      |
| The University of Texas Health Science Center at Tyler            | Arielle Lee          |
| Mercy Health – St. Elizabeth Youngstown Hospital                  | Jawad Francis        |
| Roswell Park Comprehensive Cancer Center                          | Christos Fountzilias |
| Illinois CancerCare, P.C.                                         | Srinivas Jujjavarapu |
| Texas Oncology-Baylor Charles A. Sammons Cancer Center            | Scott Paulson        |
| Memorial Cancer Institute                                         | Pablo Ferraro        |
| Utah Cancer Specialists                                           | S. DiSean Kendall    |
| Fort Wayne Medical Oncology and Hematology                        | Sunil Babu           |
| MD Anderson Cancer Center                                         | Shubham Pant         |
| Toledo Clinic Cancer Center                                       | Rex Mowat            |
| Florida Cancer Specialists East                                   | Todd Gersten         |
| Chattanooga Oncology & Hematology Associates – Tennessee Oncology | Mark Womack, IV      |
| Research Medical Center                                           | Mohammad Mozayen     |
| Banner Health MD Anderson Cancer Center                           | Madappa Kundranda    |
| Baylor College of Medicine                                        | Tannaz Armaghany     |
| Comprehensive Blood & Cancer Center                               | Pradip Rustagi       |
| Miami Cancer Institute                                            | Antonio Ucar         |
| Rocky Mountain Cancer Center                                      | Allen Cohn           |
| Compass Oncology – Rose Quarter Cancer Center                     | Spencer Shao         |
| Blue Ridge Cancer Care                                            | Mark Kochenderfer    |

|                                                         |                   |
|---------------------------------------------------------|-------------------|
| Texas Oncology, Austin                                  | Vivian Cline      |
| Texas Oncology, Northeast Texas (Tyler)                 | Donald Richards   |
| Oncology Associates of Oregon                           | Marc Uemura       |
| Texas Oncology, Wichita Falls                           | Brian K. Ulrich   |
| Maryland Oncology Hematology                            | Kashif Ali        |
| Stony Brook University Medical Center                   | Amna Sher         |
| Oregon Health & Science University (OHSU)               | Emerson Chen      |
| Hematology Oncology Clinic                              | Michael Castine   |
| Iowa Cancer Care                                        | Deborah Wilbur    |
| Mayo Clinic Rochester                                   | Wen Ma            |
| Oncology Consultants                                    | Julio Peguero     |
| Hattiesburg Clinic, P.A.                                | John “Bo” Hrom    |
| ProHealth Care Medical Associates                       | Timothy Wassenaar |
| Virginia Oncology Associates                            | David Chang       |
| Greenville Hospital System                              | Ki Chung          |
| Washington University School of Medicine in Saint Louis | Olivia Aranha     |
| Presbyterian Intercommunity Hospital (PIH)              | Lisa Wang         |
| Messino Cancer Centers                                  | Christopher Chay  |

## METHODS

### *Inclusion Criteria*

#### *General Inclusion Criteria*

- (1) Aged 18 years or older.
- (2) Able to understand and provide informed consent for participation in the study.
- (3) Eastern Cooperative Oncology Group performance status of 0 or 1.

#### *Disease-Specific Inclusion Criteria*

- (4) Histopathologically or cytologically confirmed metastatic pancreatic ductal adenocarcinoma that has not been previously treated in the metastatic setting.
- (5) Initial diagnosis of metastatic disease (according to the eighth edition of the American Joint Committee on Cancer staging manual) must have occurred  $\leq 6$  weeks prior to screening.
- (6) Patient has one or more metastatic lesions measurable by computed tomography/magnetic resonance imaging according to Response Evaluation Criteria in Solid Tumors (RECIST) version 1.1 criteria.

#### *Haematologic, Biochemical, and Organ Function Inclusion Criteria*

- (7) During the screening period, adequate biological parameters as evidenced by: (a) an absolute neutrophil count of  $\geq 2000/\text{mm}^3$  without the use of haemopoietic growth factors within the 7 days prior to randomisation; (b) a platelet count of  $\geq 100,000/\text{mm}^3$ ; (c) a haemoglobin level of  $\geq 9$  g/dL obtained  $\leq 14$  days prior to randomisation.
- (8) Adequate hepatic function as evidenced by: (a) a serum total bilirubin level of  $\leq 1.5 \times$  upper limit of normal (ULN) (biliary drainage is allowed for biliary obstruction); (b) aspartate aminotransferase and alanine aminotransferase levels of  $\leq 2.5 \times$  ULN ( $\leq 5 \times$  ULN was acceptable if liver metastases were present).
- (9) Adequate renal function as evidenced by a creatinine clearance of  $>30$  mL/min. Actual body weight should be used for calculating creatinine clearance using the Cockcroft–Gault equation (except for patients with a body mass index of  $>30$  kg/m<sup>2</sup>, for which adjusted body weight should be used instead):

$$\text{Creatinine clearance } \left( \frac{\text{mg}}{\text{mL}} \right) = \frac{(140 - \text{Age [years]}) \times (\text{Weight [kg]})}{72 \times \text{Serum creatinine } \left( \frac{\text{mg}}{\text{mL}} \right)} \times \text{Sex}$$

where Sex = 1 for men and 0.85 for women.

- (10) Electrocardiogram without any clinically significant findings at screening, as per investigator's assessment.
- (11) Adequate coagulation studies (obtained  $\leq 14$  days prior to randomisation) as demonstrated by prothrombin time and partial thromboplastin time within normal limits ( $\leq 1.5 \times$  ULN). Patients on warfarin or other vitamin K antagonists should be discussed with the sponsor.
- (12) No clinically significant abnormalities in urinalysis results (obtained within the 7 days prior to randomisation), as per investigator's assessment.
- (13) Patients infected with human immunodeficiency virus (HIV) are eligible if they meet all the following criteria: (a) CD4 count is  $\geq 350$  cells/uL, viral load is undetectable, and not taking prohibited cytochrome (CYP)-interacting medications; (b) probable long-term survival with HIV if cancer were not present; (c) stable on a highly active antiretroviral therapy (HAART) regimen for  $\geq 4$  weeks and willing to adhere to their HAART regimen with minimal overlapping toxicity and drug–drug interactions with the experimental agents in this study; (d) HIV is not multi-drug resistant; (e) taking medication and/or receiving antiretroviral therapy that does not interact or have overlapping toxicities with the study medication.

### *Exclusion Criteria*

#### *General Exclusion Criteria*

- (1) Any medical or social condition deemed by the investigator to be likely to interfere with a patient's ability to give informed consent, cooperate, and participate in the study or be likely to interfere with the interpretation of the results.

(2) Pregnancy or breastfeeding; women of childbearing potential must test negative for pregnancy at the time of enrolment based on a serum pregnancy test. Women of childbearing potential are defined as fertile, after menarche, and until becoming postmenopausal unless permanently sterile. Postmenopausal women are defined as those that have an absence of menstruation for 12 months. A high follicle stimulating hormone level in the postmenopausal range may be used to confirm a postmenopausal state in women not using hormonal contraception or hormonal replacement therapy. However, in the absence of 12 months of amenorrhoea, a single follicle stimulating hormone measurement is insufficient. Permanent sterilisation methods include hysterectomy, bilateral salpingectomy, and bilateral oophorectomy. Female patients of reproductive potential must agree to use a highly effective method of birth control during the study and for 7 months after receiving the last dose of the study drug. Men must agree to use condoms during the study and for 6 months after receiving the last dose of the study drug.

(3) Unwilling or unable to comply with study procedures and/or study visits, including long-term follow-up for survival.

#### *Disease-Specific Exclusion Criteria*

(4) Prior treatment of pancreatic cancer in the metastatic setting with surgery, radiotherapy, chemotherapy, or investigational therapy; palliative radiotherapy and placement of a biliary stent/tube are permitted.

(5) Prior treatment of pancreatic adenocarcinoma with chemotherapy in the adjuvant setting, except those in which at least 12 months have elapsed since completion of the last dose and no persistent treatment-related toxicities are present.

(6) Patient has only localised advanced disease.

(7) Documented serum albumin <3 g/dL within the 7 days prior to randomisation.

(8) Known history of central nervous system metastases. But patients on a stable or decreasing dose of steroids and deemed clinically stable as per the investigator's assessment are eligible.

(9) Clinically significant gastrointestinal disorders including hepatic disorders, bleeding, inflammation, occlusion, diarrhoea >grade 1, malabsorption syndrome, ulcerative colitis, inflammatory bowel disease, or partial bowel obstruction.

(10) History of any second malignancy in the last 2 years; patients with prior history of *in-situ* cancer or basal or squamous cell skin cancer are eligible. Patients are also eligible if they: (a) have a history of other malignancies and have been continuously disease free for at least 2 years prior to screening; (b) have a concurrent malignancy that is clinically stable and does not require tumour-directed treatment.

#### *Haematologic, Biochemical, and Organ Function Exclusion Criteria*

(11) Known hypersensitivity to any of the components of: (a) liposomal irinotecan injection, other liposomal products, or any components of 5-fluorouracil, leucovorin, or oxaliplatin; (b) nab-paclitaxel or gemcitabine.

(12) Concurrent illnesses that would be a relative contraindication to trial participation such as active cardiac or liver disease, including: (a) severe arterial thromboembolic events (myocardial infarction, unstable angina pectoris, stroke) <6 months before screening; (b) high cardiovascular risk, including recent coronary stenting or myocardial infarction in the year prior to screening; (c) New York Heart Association Class III or IV congestive heart failure, ventricular arrhythmias, or uncontrolled blood pressure; (d) known historical or active infection with hepatitis B, or active infection with hepatitis C (note that patients with hepatitis C who have been clinically cured, defined as persistent absence of hepatitis C RNA detected by polymerase chain reaction test in serum 12 weeks after completing antiviral treatment, are eligible).

(13) Active infection or an unexplained fever of >38.5°C during screening visits or on the first scheduled day of dosing that in the investigator's opinion may compromise the patient's participation in the trial or affect the study outcome.

(14) Major surgery, other than diagnostic surgery, within the 4 weeks prior to randomisation.

(15) Use of strong inhibitors or inducers of CYP3A, CYP2C8, and UGT1A1.

(16) There is presence of any contraindications outlined in the contraindications or warnings and precautions sections of: (a) the investigator's brochure for liposomal irinotecan injection, or in the prescribing information for 5-fluorouracil, leucovorin, or oxaliplatin; (b) the product prescribing information for nab-paclitaxel or gemcitabine.

(17) Neuroendocrine (carcinoid, islet cell) or acinar pancreatic carcinoma.

(19) Patients who, in the opinion of the investigator, have symptoms or signs suggestive of clinically unacceptable deterioration of the primary disease at the time of screening.

(20) History of systemic connective tissue disorders (e.g. lupus, scleroderma, arteritis nodosa).

(21) History of interstitial lung disease, history of slowly progressive dyspnoea and unproductive cough, sarcoidosis, silicosis, idiopathic pulmonary fibrosis, pulmonary hypersensitivity pneumonitis or multiple allergies, or peripheral artery disease (e.g. claudication, Leo Buerger's disease).

(23) Patients who have received a live vaccine within the 4 weeks prior to randomisation.

(24) Known low or absent dihydropyrimidine dehydrogenase (DPD) activity. If required by local regulations, testing for DPD deficiency must be performed using a validated method that is recommended by local health authorities.

## *Study Design and Treatment*

### *Discontinuation and Withdrawal*

Criteria for permanent discontinuation of study treatment for patients receiving liposomal irinotecan in combination with 5-fluorouracil, leucovorin and oxaliplatin (NALIRIFOX) or nab-paclitaxel plus gemcitabine included:

- radiologically determined progressive disease, as per RECIST version 1.1
- clinical deterioration sufficient to prevent further radiological assessment
- unacceptable toxicity, defined as a study drug related adverse event, prior to disease progression, which:
  - in the opinion of the investigator, precludes ANY further treatment with the study drug
  - requires treatment with the study drug to be withheld for more than 14 days, unless the patient is receiving benefit overall from the study treatment in the opinion of the investigator
  - would result in a fourth dose reduction in NALIRIFOX or a third dose reduction in nab-paclitaxel plus gemcitabine
  - requires discontinuation of liposomal irinotecan injection, 5-fluorouracil or leucovorin, or nab-paclitaxel or gemcitabine.
- development of an intercurrent medical condition or need for concomitant therapy that precludes any further treatment with study drug
- withdrawal of consent for further treatment and survival follow-up
- discretion of the treating physician
- pregnancy.

A patient who permanently discontinued study treatment and had not withdrawn from the study was required to continue with all ongoing protocol requirements.

Reasons for withdrawal from the study included the following:

- significant noncompliance with the protocol, as per investigator assessment
- patient was lost to follow-up
- withdrawal of consent for further participation in the study
- death
- study termination by the sponsor.

### *Outcomes*

Primary efficacy analysis.

- Overall survival (OS), defined as the number of months from randomisation to the date of death (any cause). Patients who did not have a date of death recorded at the time of the final analysis were censored at the last known time that the patient was alive.

Secondary efficacy analysis.

- Progression-free survival (PFS), defined as the number of months from randomisation to the first documented objective disease progression using RECIST version 1·1 or death due to any cause, whichever occurred first. Determination of PFS was as per investigator assessment.
- Overall response rate, defined as the proportion of patients who achieved partial response or complete response according to RECIST version 1·1 guidelines.

Exploratory objectives analysis.

- Patient-reported outcomes (PRO) exploratory endpoints were as follows:
  - time-to-deterioration or worsening of patients' physical functioning, disease-related symptoms and treatment-related symptoms of interest using the European Organisation for Research and Treatment of Cancer core quality of life questionnaire (EORTC-QLQ-C30), the specific pancreatic cancer module (QLQ-PAN26) questionnaire, and the PRO of National Cancer Institute Common Terminology Criteria for Adverse Events (CTCAE)
  - time-to-deterioration or worsening of remaining quality of life (QoL) subscales of the EORTC-QLQ-C30 and QLQ-PAN26

- % of subjects with stable, improved, or worsened QoL scores as assessed by the QLQ-C30, QLQ-PAN26, and PRO-CTCAE
- health-related QoL score at each visit as assessed by the QLQ-C30, QLQ-PAN26, PRO-CTCAE, and 5-level 5-dimension EuroQol questionnaire (EQ-5D-5L).
- Pharmacokinetics, and the relationship between pharmacokinetic exposure and efficacy and safety, of the NALIRIFOX regimen.
- Time-to-treatment-failure, defined as the number of months from randomisation to treatment discontinuation for any reason, including disease progression, treatment toxicity, patient preference, or death.
- Duration of response, defined as the time of initial response (complete response or partial response) until documented tumour progression using RECIST version 1.1 guidelines or death. For patients who did not have documented tumour progression or death, duration of response was censored at the time of the last evaluable tumour assessment.
- Time-to-response, defined as time-from-randomisation to the first objective tumour response. Time-to-response was computed only for patients who achieved complete response or partial response.
- Genotyping — the possible association between genotypes included UGT1A1\*28 and other UGT1A genotypes; SN-38 concentration (only for those treated with NALIRIFOX) and safety was described.
- Biomarkers — the biomarker CA 19-9 was measured and concentrations were compared between treatment arms.
- Biobanking — biobanked samples may be used for future analysis.
- Gene mutation and genomic alteration status associated with pancreatic adenocarcinoma of the patients was determined prior to screening if available. Several genes are associated with an increased risk of developing pancreatic ductal adenocarcinoma. Those of key interest include germline mutations and genomic alterations: BRCA1, BRCA2, PALB2, ATM, CDKN2A, MLH1, MSH2, MSH6, TP53, and EPCAM;<sup>1</sup> and somatic mutations and genomic alterations: KRAS, TP53, CDKN2A, SMAD4, RNF43, ARID1A, TGFβR2, GNAS, RREB1, and PBRM1.<sup>2</sup> Gene mutations and genomic alteration may be used for exploration of potential predictive biomarkers and correlation with clinical outcome.

#### Safety analysis.

- Safety analyses (adverse events, serious adverse events, laboratory analyses, dose modifications, and discontinuations) were performed using the safety population, defined as all patients receiving any study drug. Treatment assignment will be according to actual treatment received.
  - Adverse events were coded using Medical Dictionary for Regulatory Activities (MedDRA) version 21.0 or later.
  - Severity was graded according to the CTCAE version 5.0.
  - Treatment-emergent adverse events were defined as any adverse events reported from the date of first study drug exposure to 30 days after the last date of study drug exposure.

#### *Statistical analysis*

##### *Sample size and power considerations*

- The sample size required to demonstrate an improvement in OS with NALIRIFOX compared with nab-paclitaxel plus gemcitabine was calculated assuming that:
  - expected median OS with nab-paclitaxel plus gemcitabine would be 9 months
  - expected median OS with NALIRIFOX would be 12 months
  - a hazard ratio of 0.75 would be detected with a one-sided test
  - overall two-sided type I error rate would be 0.05 with a power of 90%
  - patients would be randomised 1:1.
- Approximately 750 patients were randomised in a 1:1 ratio to the two treatment arms. Accounting for the planned interim analysis, follow-up until at least 543 OS events were observed across the two treatment arms provided at least 90% power to detect a true hazard ratio of  $\leq 0.75$  (modified OS: 9 vs 12 months), using a stratified log-rank test with an overall two-sided significance level of 0.05.
- Assuming enrolment over 16 months increasing to approximately 62 patients per month, with 5% of patients lost to follow-up across both treatment arms, the timing of the interim and final analyses was expected to be at 24 months and 36.5 months, respectively, after the first patient was treated.

##### *Primary efficacy analysis*

- There were two planned analyses of OS: interim analysis and final analysis. The interim analysis was planned when at least 272 OS events had been observed in the intention-to-treat population. If that analysis did not indicate

futility or efficacy, then the final analysis was planned at 543 OS events when all planned patients had been enrolled.

- The overall type I error was controlled at a two-sided significance level of 0.05 (equivalent to one-sided level of 0.025). To control type I and type II errors, the Hwang-Shih-DeCani (HSD)  $\alpha$  and (non-binding)  $\beta$  spending function with  $\gamma$  parameter equal to  $-4$  for type I error type and  $\gamma$  equal to  $-1$  for type II error was utilized with respective alpha allocations of 0.006 and 0.048 for the interim and final analyses, respectively. The futility stopping boundary is specified as no binding.

#### *Secondary efficacy analysis*

- Secondary efficacy endpoints were to be tested no more than once. If the primary endpoint of OS was declared significant at the interim analysis, secondary efficacy endpoints were to be tested at the interim, or otherwise, at the final analysis if OS was found to be statistically significant at that analysis.
- Hypothesis testing of secondary efficacy endpoints was conducted in a stagewise hierarchical manner incorporating  $\alpha$  spending for each endpoint using HSD $_{\alpha}$  of  $-4$ , similar to that specified for the primary efficacy analysis.
- The nominal level for the comparison depended on whether the analysis was carried out at the OS interim or at the planned OS final analysis.
- The first endpoint in the hierarchy of secondary endpoints was PFS. If OS and PFS were both significant, then objective response rate would be tested. Any parameter not formally tested for significance (as per the hierarchy) was to be regarded as descriptive and exploratory.



## TABLES

**Table S1 (online only). Number of patients recruited and randomised at each participating site.**

| Country          | Site Name                                                                         | Principal Investigator           | Patients recruited, n | Patients randomised, n |
|------------------|-----------------------------------------------------------------------------------|----------------------------------|-----------------------|------------------------|
| <b>Australia</b> | Monash Medical Centre                                                             | Andrew Strickland                | 3                     | 3                      |
|                  | Bankstown-Lidcombe Hospital                                                       | Ray Asghari                      | 1                     | 1                      |
|                  | Sir Charles Gairdner Hospital                                                     | Siobhan Ng                       | 2                     | 1                      |
|                  | Fiona Stanley Hospital                                                            | Christopher Lomma                | 9                     | 8                      |
|                  | St John of God Subiaco Hospital                                                   | Andrew Dean                      | 11                    | 10 <sup>a</sup>        |
|                  | Queen Elizabeth Hospital                                                          | Vy Broadbridge                   | 2                     | 2                      |
| <b>Austria</b>   | Ordensklinikum Linz GmbH Barmherzige Schwestern                                   | Andreas Petzer                   | 4                     | 4                      |
|                  | Medizinische Universitaet Wien                                                    | Gerald Prager                    | 7                     | 5                      |
|                  | Uniklinikum Salzburg – Universitaetsklinik fuer Nuklearmedizin und Endokrinologie | Richard Greil                    | 10                    | 6                      |
|                  | Medizinische Universitaet Graz                                                    | Armin Gerger                     | 3                     | 2                      |
| <b>Belgium</b>   | Hospital Centre Jolimont                                                          | Alexandre Dermine                | 6                     | 5                      |
|                  | Universitaire Ziekenhuizen Leuven                                                 | Eric Van Cutsem                  | 1                     | 1                      |
|                  | University Hospital Gent                                                          | Karen Geboes                     | 3                     | 2                      |
|                  | ASBL Grand Hôpital de Charleroi (GHdC) – Site Notre Dame                          | Isabelle Sinapi                  | 3                     | 2                      |
|                  | Onze-Lieve-Vrouwziekenhuis                                                        | Koen Hendrickx                   | 7                     | 7                      |
|                  | University Hospital Mont-Godinne                                                  | Lionel d'Hondt                   | 4                     | 2                      |
| <b>Brazil</b>    | Instituto Nacional de Câncer (INCA)                                               | Bruno dos Santos Vilhena Pereira | 1                     | 1                      |
|                  | CIP – Centro Integrado de Pesquisas do Hospital de Base de São José do Rio Preto  | Káthia Cristina Abdalla          | 5                     | 3                      |
|                  | Hospital de Caridade de Ijuí                                                      | Fábio Franke                     | 4                     | 1                      |
|                  | ICESP – Instituto do Câncer do Estado de São Paulo                                | Luiz Antonio Senna Leite         | 1                     | 1                      |
|                  | Fundação Pio XII – Hospital de Câncer de Barretos                                 | Arinilda Campos Bragagnoli       | 13                    | 8                      |
|                  | Clinica Neoplasias Litoral                                                        | Giuliano Borges                  | 3                     | 3                      |
|                  | Hospital Alemão Oswaldo Cruz                                                      | Cheng Tzu Yen                    | 10                    | 6                      |
|                  | Irmandade da Santa Casa de Misericórdia de Porto Alegre                           | Katsuki Arima Tiscoski           | 4                     | 3                      |

|                |                                                                 |                                         |    |    |
|----------------|-----------------------------------------------------------------|-----------------------------------------|----|----|
|                | IOP – Instituto de Oncologia do Paraná                          | Luciano Semensato Biela                 | 1  | 1  |
|                | Hospital Bruno Born                                             | Rafael Seewald                          | 4  | 4  |
|                | CRIO – Centro Regional Integrado de Oncologia                   | Eduardo Henrique Cronemberger           | 5  | 2  |
|                | CEPON – Centro de Pesquisas Oncológicas                         | Yeni Verônica Nerón                     | 6  | 2  |
|                | CePclin – Centro de Pesquisas Clínicas de Natal                 | Juliana Florinda de Mendonça Rego       | 3  | 3  |
|                | Centro de Pesquisa – Instituto COI                              | Fernando Meton de Alencar Câmara Vieira | 3  | 2  |
| <b>Canada</b>  | Alberta Health Services Cross Cancer Institute                  | Michael Sawyer                          | 3  | 1  |
|                | Centre Hospitalier Universitaire de Sherbrooke                  | Frédéric Lemay                          | 5  | 3  |
|                | Queen Elizabeth II Health Sciences Centre                       | Ravi Ramjeesingh                        | 2  | 2  |
|                | McGill University Faculty of Medicine – Royal Victoria Hospital | Jamil Asselah                           | 8  | 6  |
| <b>Czechia</b> | Fakultní Nemocnice Hradec Králové                               | Stanislav John                          | 12 | 10 |
|                | Fakultní Thomayerova Nemocnice                                  | Eugen Kubala                            | 9  | 7  |
|                | Masarykův Onkologický Ústav                                     | Igor Kiss                               | 18 | 13 |
|                | Department of Oncology, University Hospital Olomouc             | Bohuslav Melichar                       | 10 | 8  |
| <b>France</b>  | Centre Hospitalier Universitaire de Poitiers                    | Camille Evrard                          | 3  | 3  |
|                | CHRU de Tours – Hôpital Trousseau                               | Thierry Lecomte                         | 8  | 8  |
|                | Centre Oscar Lambret                                            | Diane Pannier                           | 7  | 6  |
|                | Hôpital Privé Jean Mermoz                                       | Pascal Artru                            | 6  | 5  |
|                | AP-HP Hôpital Saint Louis                                       | Thomas Aparicio                         | 2  | 2  |
|                | Strasbourg Oncologie Liberale                                   | Louis Marie Dourthe                     | 2  | 1  |
|                | Hôpital Édouard Herriot – Hospices Civils de Lyon               | Thomas Walter                           | 4  | 2  |
|                | CHU Bordeaux – Hôpital Haut-Lévêque                             | Eric Terrebonne                         | 8  | 7  |
|                | Centre Antoine Lacassagne                                       | Angélique Saint                         | 6  | 5  |
|                | Centre Léon Bérard                                              | Christelle De La Fouchardière           | 14 | 11 |
| <b>Germany</b> | Asklepios Klinik Altona                                         | Dirk Arnold                             | 6  | 4  |
|                | Klinikum Mannheim                                               | Nadine Schulte                          | 4  | 3  |
|                | Universitaetsklinikum Ulm                                       | Thomas Seufferlein                      | 2  | 1  |
|                | Krankenhaus Nordwest GmbH                                       | Thorsten Götze                          | 10 | 10 |
|                | Universitaetsklinikum Tuebingen                                 | Michael Bitzer                          | 3  | 1  |
|                | Martin-Luther-Universitaet Halle-Wittenberg                     | Petra Büchner-Stuedel                   | 2  | 2  |

|                    |                                                                                        |                           |    |    |
|--------------------|----------------------------------------------------------------------------------------|---------------------------|----|----|
|                    | SLK-Kliniken Heilbronn GmbH                                                            | Uwe Martens               | 10 | 8  |
|                    | Krankenhaus St. Franziskus – Kliniken Maria Hilf GmbH                                  | Ullrich Graeven           | 3  | 3  |
|                    | Facharztzentrum Eppendorf                                                              | Eray Gökkurt              | 10 | 9  |
|                    | St. Josef-Hospital                                                                     | Anke Reinacher-Schick     | 3  | 2  |
|                    | Studiengesellschaft BSF                                                                | Norbert Steudel           | 1  | 1  |
| <b>Greece</b>      | University General Hospital of Ioannina                                                | Davide Mauri              | 2  | 1  |
|                    | National and Kapodistrian University of Athens                                         | Christos Papadimitriou    | 2  | 1  |
|                    | Agios Savvas Anticancer Hospital                                                       | Alexandros Ardavanis      | 1  | 1  |
|                    | Eugeneideion Therapeutirion Hospital                                                   | Michalis Karamouzis       | 1  | 1  |
| <b>Hungary</b>     | Jász-Nagykun-Szolnok Megyei Hetényi Géza Kórház-Rendelőintézet                         | Tibor Csósz               | 7  | 5  |
|                    | Semmelweis Egyetem Belgyógyászati és Hematológiai Klinika                              | Júlia Lohinszky           | 1  | 1  |
|                    | Országos Onkológiai Intézet                                                            | Erika Hitre               | 4  | 1  |
|                    | Debreceni Egyetem Klinikai Központ                                                     | Péter Árkosy              | 6  | 3  |
|                    | Somogy Megyei Kaposi Mór Oktató Kórház                                                 | Lukács Gábor              | 4  | 3  |
|                    | Dél-pesti Centrumkórház - Szent László Kórház Telephely                                | Bodoky György             | 9  | 5  |
| <b>Israel</b>      | Rambam Health Care Campus                                                              | Maria Passhak             | 6  | 4  |
|                    | Soroka Medical Center                                                                  | Alexander Gluzman         | 1  | 1  |
| <b>Italy</b>       | AUSL di Piacenza-Ospedale Guglielmo Da Saliceto                                        | Luigi Cavanna             | 3  | 2  |
|                    | Azienda Ospedaliero-Universitaria di Modena                                            | Fabio Gelsomino           | 2  | 1  |
|                    | Istituto Europeo di Oncologia                                                          | Nicola Fazio              | 4  | 4  |
|                    | Azienda Ospedaliero-Universitaria Pisana                                               | Enrico Vasile             | 2  | 1  |
|                    | Azienda Ospedaliera-Universitaria Integrata Verona-Ospedale Borgo Roma                 | Davide Melisi             | 49 | 39 |
|                    | IRCCS Azienda Ospedaliero-Universitaria di Bologna-Policlinico di Sant'Orsola-Malpighi | Giovanni Brandi           | 5  | 4  |
|                    | IRCCS Istituto Romagnolo per lo Studio dei Tumori Dino Amadori - IRST S.r.l.           | Giovanni Luca Frassinetti | 6  | 2  |
|                    | Azienda Ospedaliero Universitaria-Ospedali Riuniti di Ancona                           | Rossana Berardi           | 2  | 2  |
| <b>South Korea</b> | CHA Bundang Medical Center                                                             | Hong Jae Chon             | 1  | 1  |
|                    | National Cancer Center                                                                 | Woo Jin Lee               | 12 | 9  |
|                    | Inje University Haeundae Paik Hospital                                                 | Il Hwan Kim               | 7  | 6  |
|                    | Korea University Guro Hospital                                                         | Sang Cheul Oh             | 5  | 4  |

|                 |                                                                                                                                                |                              |    |    |
|-----------------|------------------------------------------------------------------------------------------------------------------------------------------------|------------------------------|----|----|
|                 | Seoul St. Mary's Hospital, The Catholic University of Korea                                                                                    | Myung-Ah Lee                 | 2  | 1  |
|                 | Asan Medical Center                                                                                                                            | Baek-Yeol Ryoo               | 2  | 1  |
| <b>Portugal</b> | Centro Hospitalar de Vila Nova de Gaia/Espinho, EPE                                                                                            | António Moreira Pinto        | 1  | 1  |
|                 | Hospital de Braga                                                                                                                              | Ana Daniela Marques          | 2  | 1  |
|                 | Unidade Local de Saúde Matosinhos, EPE – Hospital Pedro Hispano                                                                                | Alexandra Mesquita Magalhaes | 3  | 2  |
|                 | Champalimaud Foundation                                                                                                                        | Nuno Couto                   | 5  | 5  |
|                 | Centro Hospitalar Universitário de Lisboa Norte, EPE – Hospital de Santa Maria                                                                 | Catarina Abreu               | 2  | 1  |
| <b>Russia</b>   | Federal State Budgetary Institution – The Russian Scientific Center of Radiology and Surgical Technologies named after Academician A.M. Granov | Luiza Korytova               | 5  | 4  |
|                 | EviMed LLC                                                                                                                                     | Oleg Gladkov                 | 6  | 5  |
|                 | Kursk Oncological Research and Clinical named after G.E. Ostroverkhov                                                                          | Igor Lifirenko               | 12 | 9  |
|                 | Clinica Druzhkovyh LLC                                                                                                                         | Ekaterina Amirova            | 2  | 1  |
|                 | Main Military Clinical Hospital named after N.N. Burdenko                                                                                      | Alexey Smolin                | 4  | 2  |
|                 | Volga District Medical Centre                                                                                                                  | Anna Alyasova                | 4  | 4  |
| <b>Spain</b>    | Hospital General Universitario de Elche                                                                                                        | Javier Gallego Plazas        | 13 | 11 |
|                 | Hospital Universitario Marqués de Valdecilla                                                                                                   | Fernando Rivera Herrero      | 14 | 11 |
|                 | Complejo Hospitalario Universitario de Granada – Hospital Universitario Virgen de las Nieves                                                   | Joaquina Martínez Galán      | 1  | 1  |
|                 | Hospital de la Santa Creu i Sant Pau                                                                                                           | Raúl Terés Lleida            | 9  | 6  |
|                 | Centro Integral Oncológico Clara Campal                                                                                                        | Antonio Cubillo Gracián      | 15 | 11 |
|                 | Hospital Universitario Vall d'Hebron                                                                                                           | Teresa Macarulla Mercadé     | 12 | 11 |
|                 | Corporació Sanitària Parc Tauli – Hospital de Sabadell                                                                                         | Ismael Macías Declara        | 10 | 9  |
|                 | Hospital Regional Universitario de Málaga                                                                                                      | Inmaculada Alés Díaz         | 8  | 3  |
|                 | Hospital Universitario de Badajoz                                                                                                              | Marta González Cordero       | 9  | 5  |
|                 | Hospital General Universitario Gregorio Marañón                                                                                                | Andres Muñoz Martín          | 5  | 3  |
|                 | Hospital Fundación Jiménez Díaz                                                                                                                | Cristina Caramés Sánchez     | 7  | 6  |
|                 | Hospital Clínic de Barcelona                                                                                                                   | Tamara Saurí Nadal           | 4  | 2  |
|                 | Hospital Universitario La Paz                                                                                                                  | Jaime Feliú Batlle           | 11 | 10 |
|                 | Hospital Universitario Miguel Servet                                                                                                           | Roberto Pazo Cid             | 34 | 21 |
|                 | Institut Català d'Oncologia – L'Hospitalet                                                                                                     | Berta Laquente               | 7  | 7  |
|                 | Complejo Hospitalario de Navarra                                                                                                               | Ruth Vera                    | 7  | 7  |

|                       |                                                                                         |                        |    |    |
|-----------------------|-----------------------------------------------------------------------------------------|------------------------|----|----|
|                       | Hospital Germans Trias i Pujol                                                          | Laura Layos Romero     | 8  | 8  |
|                       | Hospital Universitario 12 de Octubre                                                    | Rocío García Carbonero | 8  | 5  |
|                       | Hospital Quirónsalud Barcelona                                                          | José Luis Cuadra       | 6  | 6  |
| <b>United Kingdom</b> | Cancer Research UK – The Christie NHS Foundation Trust – Department of Medical Oncology | Richard Hubner         | 1  | 1  |
|                       | Nottingham City Hospital                                                                | Arvind Arora           | 2  | 1  |
|                       | Royal Marsden NHS Foundation Trust                                                      | Ian Chau               | 3  | 3  |
|                       | Guy’s and St. Thomas’ NHS Foundation Trust                                              | Paul Ross              | 5  | 5  |
|                       | Imperial College Healthcare NHS Trust                                                   | Harpreet Wasan         | 2  | 2  |
|                       | Institute of Cancer Research                                                            | Ian Chau               | 1  | 1  |
| <b>United States</b>  | University of California Los Angeles (UCLA)                                             | Zev Wainberg           | 10 | 9  |
|                       | Sarah Cannon and HCA Research Institute                                                 | David Spigel           | 6  | 6  |
|                       | Carle Foundation Hospital                                                               | Suparna Mantha         | 2  | 2  |
|                       | Maine Medical Center                                                                    | Matthew Dugan          | 1  | 1  |
|                       | HealthPartners Institute                                                                | Daniel Anderson        | 6  | 5  |
|                       | Oncology Hematology West P.C. dba Nebraska Cancer Specialists                           | Nagendra Natarajan     | 7  | 4  |
|                       | Cancer and Hematology Centers of Western Michigan                                       | Sreenivasa Chandana    | 16 | 13 |
|                       | University of Rochester                                                                 | Aram Hezel             | 8  | 5  |
|                       | Beth Israel Deaconess Medical Center                                                    | Mary Peters            | 6  | 4  |
|                       | Willis-Knighton Cancer Center                                                           | Anil Veluvolu          | 3  | 3  |
|                       | Mount Sinai Medical Center of Florida, Inc.                                             | Mike Cusnir            | 4  | 1  |
|                       | Clinical Research Alliance, Inc                                                         | Morton Coleman         | 2  | 1  |
|                       | Kaiser Permanente – Northwest                                                           | Sandeep Mashru         | 4  | 3  |
|                       | University of California, Irvine Medical Center                                         | Farshid Dayyani        | 9  | 5  |
|                       | Henry Ford Health System                                                                | Gazala Khan            | 13 | 10 |
|                       | University of Alabama at Birmingham                                                     | Grant Williams         | 7  | 4  |
|                       | Pikeville Medical Center                                                                | Mohamad Khasawneh      | 2  | 1  |
|                       | Froedtert Hospital and the Medical College of Wisconsin                                 | Mandana Kamgar         | 3  | 2  |
|                       | University of Kentucky, Markey Cancer Center                                            | Reema Patel            | 4  | 3  |
|                       | The Center for Cancer and Blood Disorders                                               | Henry Xiong            | 4  | 3  |

|                                                                                                                                                    |                      |    |                |
|----------------------------------------------------------------------------------------------------------------------------------------------------|----------------------|----|----------------|
| The Ohio State University Comprehensive Cancer Center - Arthur G. James Cancer Hospital and Richard J. Solovev Research Institute (OSUCCC – James) | Anne Noonan          | 3  | 2              |
| David H. Koch Center for Cancer Care at Memorial Sloan Kettering Cancer Center                                                                     | Alice Zervoudakis    | 12 | 7              |
| Houston Methodist Research Institute                                                                                                               | Maen Abdelrahim      | 5  | 2              |
| University of Pittsburgh Medical Center (UPMC) Hillman Cancer Center                                                                               | Roby Thomas          | 6  | 3              |
| University of Oklahoma Health Sciences Center                                                                                                      | Hassan Hatoum        | 10 | 6              |
| Virginia Cancer Specialists                                                                                                                        | Keeran Sampat        | 4  | 4              |
| Mayo Clinic Scottsdale                                                                                                                             | Tanios Bekaii-Saab   | 3  | 2              |
| City of Hope National Medical Center                                                                                                               | Vincent Chung        | 9  | 4              |
| Sutter Health Sacramento                                                                                                                           | Deepti Behl          | 1  | 1              |
| Ochsner Medical Center                                                                                                                             | Suma Satti           | 1  | 1              |
| Siouxland Hematology-Oncology Associates, LLP                                                                                                      | Donald Wender        | 2  | 1              |
| Frontier Cancer Center                                                                                                                             | Patrick Cobb         | 2  | 1              |
| Florida Cancer Specialists Panhandle                                                                                                               | Pareshkumar Patel    | 7  | 4              |
| Florida Cancer Specialists St. Petersburg                                                                                                          | Maen Hussein         | 25 | 13             |
| Florida Cancer Specialists Fort Myers                                                                                                              | Anjan Patel          | 15 | 7              |
| Torrance Memorial Physician Network Cancer Care                                                                                                    | Hugo Hool            | 4  | 3              |
| Comprehensive Cancer Centers of Nevada                                                                                                             | Brian Vicuna         | 6  | 6              |
| St. Jude Hospital Yorba Linda dba St. Joseph Heritage Healthcare                                                                                   | David Park           | 6  | 2              |
| Illinois CancerCare, P.C.                                                                                                                          | Srinivas Jujjavarapu | 1  | 1              |
| Texas Oncology-Baylor Charles A. Sammons Cancer Center                                                                                             | Scott Paulson        | 6  | 3              |
| Utah Cancer Specialists                                                                                                                            | S. DiSean Kendall    | 5  | 4              |
| Fort Wayne Medical Oncology and Hematology                                                                                                         | Sunil Babu           | 5  | 3 <sup>b</sup> |
| MD Anderson Cancer Center                                                                                                                          | Shubham Pant         | 3  | 2              |
| Florida Cancer Specialists East                                                                                                                    | Todd Gersten         | 6  | 6              |
| Chattanooga Oncology & Hematology Associates – Tennessee Oncology                                                                                  | Mark Womack, IV      | 10 | 9              |
| Research Medical Center                                                                                                                            | Mohammad Mozayen     | 1  | 1              |
| Banner Health MD Anderson Cancer Center                                                                                                            | Madappa Kundranda    | 3  | 1              |
| Baylor College of Medicine                                                                                                                         | Tannaz Armaghany     | 2  | 2              |
| Comprehensive Blood & Cancer Center                                                                                                                | Pradip Rustagi       | 2  | 1              |

|                                               |                   |   |   |
|-----------------------------------------------|-------------------|---|---|
| Miami Cancer Institute                        | Antonio Ucar      | 6 | 2 |
| Rocky Mountain Cancer Center                  | Allen Cohn        | 9 | 7 |
| Compass Oncology – Rose Quarter Cancer Center | Spencer Shao      | 6 | 6 |
| Blue Ridge Cancer Care                        | Mark Kochenderfer | 8 | 4 |
| Texas Oncology, Austin                        | Vivian Cline      | 3 | 2 |
| Texas Oncology, Northeast Texas (Tyler)       | Donald Richards   | 5 | 3 |
| Oncology Associates of Oregon                 | Marc Uemura       | 1 | 1 |
| Texas Oncology, Wichita Falls                 | Brian K. Ulrich   | 3 | 1 |
| Maryland Oncology Hematology                  | Kashif Ali        | 3 | 3 |
| Stony Brook University Medical Center         | Amna Sher         | 2 | 2 |
| Oregon Health & Science University (OHSU)     | Emerson Chen      | 2 | 1 |
| Hematology Oncology Clinic                    | Michael Castine   | 2 | 1 |
| Mayo Clinic Rochester                         | Wen Ma            | 4 | 1 |
| Oncology Consultants                          | Julio Peguero     | 5 | 3 |
| Greenville Hospital System                    | Ki Chung          | 3 | 1 |
| Presbyterian Intercommunity Hospital (PIH)    | Lisa Wang         | 3 | 2 |
| Messino Cancer Centers                        | Christopher Chay  | 4 | 3 |

<sup>a</sup>One patient transferred from Fiona Stanley Hospital. <sup>b</sup>One patient transferred from Florida Cancer Specialists Fort Myers.

**Table S2 (online only). Summary of major protocol deviations (intention-to-treat population).**

|                                                      | <b>NALIRIFOX</b><br><b>(n=383)</b> | <b>Nab-paclitaxel +<br/>gemcitabine</b><br><b>(n=387)</b> | <b>All patients</b><br><b>(n=770)</b> |
|------------------------------------------------------|------------------------------------|-----------------------------------------------------------|---------------------------------------|
| Patients with major protocol deviations, n (%)       | 256 (66.8)                         | 233 (60.2)                                                | 489 (63.5)                            |
| Study treatment non-compliance                       | 200 (52.2)                         | 153 (39.5)                                                | 353 (45.8)                            |
| Safety reporting non-compliance                      | 36 (9.4)                           | 43 (11.1)                                                 | 79 (10.3)                             |
| Eligibility criteria deviation                       | 28 (7.3)                           | 48 (12.4)                                                 | 76 (9.9)                              |
| Informed consent non-compliance                      | 38 (9.9)                           | 29 (7.5)                                                  | 67 (8.7)                              |
| Randomisation/Treatment allocation process deviation | 20 (5.2)                           | 13 (3.4)                                                  | 33 (4.3)                              |
| Procedures deviation                                 | 18 (4.7)                           | 13 (3.4)                                                  | 31 (4.0)                              |
| GCP non-compliance                                   | 18 (4.7)                           | 9 (2.3)                                                   | 27 (3.5)                              |
| Prohibited medication/therapy/surgery                | 14 (3.7)                           | 9 (2.3)                                                   | 23 (3.0)                              |
| Time window deviation                                | 8 (2.1)                            | 8 (2.1)                                                   | 16 (2.1)                              |
| Withdrawal criteria deviation                        | 3 (0.8)                            | 7 (1.8)                                                   | 10 (1.3)                              |
| Combination of minor deviations                      | 0 (0.0)                            | 6 (1.6)                                                   | 6 (0.8)                               |

GCP, good clinical practice; NALIRIFOX, liposomal irinotecan in combination with 5-fluorouracil, leucovorin, and oxaliplatin.



**Table S3 (online only). Subsequent therapy (safety population).**

|                                                   | <b>NALIRIFOX</b><br><b>(n=370)</b> | <b>Nab-paclitaxel +<br/>gemcitabine</b><br><b>(n=379)</b> |
|---------------------------------------------------|------------------------------------|-----------------------------------------------------------|
| Any further subsequent anti-cancer therapy, n (%) | 187 (50.5)                         | 206 (54.4)                                                |
| Systemic anti-neoplastic therapy                  | 187 (50.5)                         | 206 (54.4)                                                |
| Surgery                                           | 1 (0.3)                            | 2 (0.5)                                                   |
| Radiotherapy                                      | 2 (0.5)                            | 4 (1.1)                                                   |

NALIRIFOX, liposomal irinotecan in combination with 5-fluorouracil, leucovorin, and oxaliplatin.

**Table S4 (online only). List of anticancer therapies.**

| <b>Gemcitabine-based</b>                          | <b>5-fluorouracil-based</b>                                | <b>Liposomal irinotecan-based</b>                          |
|---------------------------------------------------|------------------------------------------------------------|------------------------------------------------------------|
| capecitabine;gemcitabine                          | cisplatin;fluorouracil;folinic acid                        | fluorouracil;irinotecan hydrochloride trihydrate liposomal |
| carboplatin;gemcitabine                           | fluorouracil                                               | irinotecan hydrochloride trihydrate liposomal              |
| cisplatin;gemcitabine                             | fluorouracil;folinic acid                                  |                                                            |
| erlotinib;gemcitabine                             | fluorouracil;folinic acid;irinotecan                       |                                                            |
| gemcitabine                                       | fluorouracil;folinic acid;irinotecan;oxaliplatin           |                                                            |
| gemcitabine hydrochloride                         | fluorouracil;folinic acid;oxaliplatin                      |                                                            |
| gemcitabine;paclitaxel                            | uracil;irinotecan hydrochloride trihydrate liposomal       |                                                            |
| gemcitabine;paclitaxel nanoparticle albumin-bound | fluorouracil;irinotecan;oxaliplatin                        |                                                            |
|                                                   | fluorouracil;mitomycin                                     |                                                            |
|                                                   | fluorouracil;oxaliplatin                                   |                                                            |
|                                                   | fluorouracil;irinotecan hydrochloride trihydrate liposomal |                                                            |
|                                                   | irinotecan hydrochloride trihydrate liposomal              |                                                            |

**Table S5 (online only). Reasons for exclusion from the per-protocol population.**

| Patient     | Reason                                                                                                                                                                                                                                   |
|-------------|------------------------------------------------------------------------------------------------------------------------------------------------------------------------------------------------------------------------------------------|
| 05600300002 | EC12a: Severe arterial thromboembolic events (myocardial infarction, unstable angina pectoris, stroke) less than 6 months before screening                                                                                               |
| 07600900002 | EC21: History of interstitial lung disease, history of slowly progressive dyspnoea and unproductive cough, sarcoidosis, silicosis, idiopathic pulmonary fibrosis, pulmonary hypersensitivity pneumonitis or multiple allergies           |
| 07601300003 | EC3: Prior treatment of pancreatic cancer in the metastatic setting with surgery, radiotherapy, chemotherapy or investigational therapy that was not palliative radiotherapy or placement of a biliary stent/tube                        |
| 20300400006 | EC22: History of peripheral artery disease (e.g. claudication, Leo Buerger's disease)                                                                                                                                                    |
| 25000200007 | Randomised but not dosed                                                                                                                                                                                                                 |
| 25001000008 | Randomised but not dosed                                                                                                                                                                                                                 |
| 27600500006 | IC3&IC4: Did not have histologically or cytologically confirmed adenocarcinoma of the pancreas not previously treated in the metastatic setting; initial diagnosis of metastatic disease did not occur $\leq 6$ weeks prior to screening |
| 38000600010 | Randomised but not dosed                                                                                                                                                                                                                 |
| 38000800004 | Randomised but not dosed                                                                                                                                                                                                                 |
| 62000400004 | EC18: Neuroendocrine (carcinoid, islet cell) or acinar pancreatic carcinoma                                                                                                                                                              |
| 64300100004 | IC7c: Biological parameters inadequate – haemoglobin was not $\geq 9$ g/dL obtained $\leq 14$ days prior to randomisation; randomised but not dosed                                                                                      |
| 64300200006 | EC3: Prior treatment of pancreatic cancer in the metastatic setting with surgery, radiotherapy, chemotherapy or investigational therapy that was not palliative radiotherapy or placement of a biliary stent/tube                        |
| 64300300012 | Randomised but not dosed                                                                                                                                                                                                                 |
| 72400500010 | Randomised but not dosed                                                                                                                                                                                                                 |
| 72400600003 | EC5: Localised advanced disease                                                                                                                                                                                                          |
| 72400900009 | Randomised but not dosed                                                                                                                                                                                                                 |

|             |                                                                                                                                                                                                                                          |
|-------------|------------------------------------------------------------------------------------------------------------------------------------------------------------------------------------------------------------------------------------------|
| 72401400018 | IC3&IC4: Did not have histologically or cytologically confirmed adenocarcinoma of the pancreas not previously treated in the metastatic setting; initial diagnosis of metastatic disease did not occur $\leq 6$ weeks prior to screening |
| 72401700001 | Randomised but not dosed                                                                                                                                                                                                                 |
| 72401700008 | EC21: History of interstitial lung disease, history of slowly progressive dyspnoea and unproductive cough, sarcoidosis, silicosis, idiopathic pulmonary fibrosis, pulmonary hypersensitivity pneumonitis or multiple allergies           |
| 82600400003 | IC8a: Hepatic function inadequate - serum total bilirubin was not $\leq 1.5$ times the upper limit of normal                                                                                                                             |
| 84000100009 | Randomised but not dosed                                                                                                                                                                                                                 |
| 84000800002 | EC18: Neuroendocrine (carcinoid, islet cell) or acinar pancreatic carcinoma                                                                                                                                                              |
| 84002000008 | Randomised but not dosed                                                                                                                                                                                                                 |
| 84002100005 | Randomised but not dosed                                                                                                                                                                                                                 |
| 84002600001 | Randomised but not dosed                                                                                                                                                                                                                 |
| 84004800019 | Randomised but not dosed                                                                                                                                                                                                                 |
| 84004800024 | Randomised but not dosed                                                                                                                                                                                                                 |
| 84005100003 | IC8a: Hepatic function inadequate - serum total bilirubin was not $\leq 1.5$ times the upper limit of normal; randomised but not dosed                                                                                                   |
| 84006500002 | Randomised but not dosed                                                                                                                                                                                                                 |
| 84006800003 | Randomised but not dosed                                                                                                                                                                                                                 |
| 84006900001 | Randomised but not dosed                                                                                                                                                                                                                 |
| 84007600005 | Randomised but not dosed                                                                                                                                                                                                                 |
| 84007700007 | Prohibited concomitant medication                                                                                                                                                                                                        |
| 84008300004 | Randomised but not dosed                                                                                                                                                                                                                 |
| 84010200001 | EC20a: History of systemic connective tissue disorders (e.g. lupus, scleroderma, arteritis nodosa)                                                                                                                                       |

**Table S6 (online only). Treatment-emergent adverse events of any grade occurring in  $\geq 10\%$  of patients in either treatment arm (safety population).**

| TEAE* — No. (%)                                             | NALIRIFOX<br>(n=370) | Nab-paclitaxel +<br>gemcitabine<br>(n=379) | All patients<br>(n=749) |
|-------------------------------------------------------------|----------------------|--------------------------------------------|-------------------------|
| <b>Gastrointestinal disorders</b>                           |                      |                                            |                         |
| Diarrhoea                                                   | 261 (70.5)           | 139 (36.7)                                 | 400 (53.4)              |
| Nausea                                                      | 220 (59.5)           | 162 (42.7)                                 | 382 (51.0)              |
| Vomiting                                                    | 147 (39.7)           | 100 (26.4)                                 | 247 (33.0)              |
| Constipation                                                | 93 (25.1)            | 113 (29.8)                                 | 206 (27.5)              |
| Abdominal pain                                              | 98 (26.5)            | 77 (20.3)                                  | 175 (23.4)              |
| Stomatitis                                                  | 50 (13.5)            | 45 (11.9)                                  | 95 (12.7)               |
| <b>General disorders and administration site conditions</b> |                      |                                            |                         |
| Fatigue                                                     | 120 (32.4)           | 143 (37.7)                                 | 263 (35.1)              |
| Asthenia                                                    | 114 (30.8)           | 104 (27.4)                                 | 218 (29.1)              |
| Oedema peripheral                                           | 52 (14.1)            | 108 (28.5)                                 | 160 (21.4)              |
| Pyrexia                                                     | 39 (10.5)            | 87 (23.0)                                  | 126 (16.8)              |
| Mucosal inflammation                                        | 51 (13.8)            | 16 (4.2)                                   | 67 (8.9)                |
| <b>Nervous system disorders</b>                             |                      |                                            |                         |
| Neuropathy peripheral                                       | 66 (17.8)            | 66 (17.4)                                  | 132 (17.6)              |
| Dysgeusia                                                   | 63 (17.0)            | 58 (15.3)                                  | 121 (16.2)              |
| Peripheral sensory neuropathy                               | 56 (15.1)            | 51 (13.5)                                  | 107 (14.3)              |
| Paresthesia                                                 | 44 (11.9)            | 33 (8.7)                                   | 77 (10.3)               |

| <b>Blood and lymphatic system disorders</b>             |            |            |            |
|---------------------------------------------------------|------------|------------|------------|
| Anaemia                                                 | 97 (26.2)  | 153 (40.4) | 250 (33.4) |
| Neutropenia                                             | 109 (29.5) | 121 (31.9) | 230 (30.7) |
| Thrombocytopenia                                        | 50 (13.5)  | 86 (22.7)  | 136 (18.2) |
| <b>Metabolism and nutrition disorders</b>               |            |            |            |
| Decreased appetite                                      | 136 (36.8) | 106 (28.0) | 242 (32.3) |
| Hypokalaemia                                            | 117 (31.6) | 49 (12.9)  | 166 (22.2) |
| Dehydration                                             | 41 (11.1)  | 32 (8.4)   | 73 (9.7)   |
| <b>Investigations</b>                                   |            |            |            |
| Neutrophil count decreased                              | 76 (20.5)  | 71 (18.7)  | 147 (19.6) |
| Weight decreased                                        | 82 (22.2)  | 33 (8.7)   | 115 (15.4) |
| Platelet count decreased                                | 39 (10.5)  | 68 (17.9)  | 107 (14.3) |
| Alanine aminotransferase increased                      | 45 (12.2)  | 48 (12.7)  | 93 (12.4)  |
| Aspartate aminotransferase increased                    | 40 (10.8)  | 40 (10.6)  | 80 (10.7)  |
| $\gamma$ -glutamyltransferase increased                 | 45 (12.2)  | 34 (9.0)   | 79 (10.5)  |
| Blood alkaline phosphatase increased                    | 39 (10.5)  | 31 (8.2)   | 70 (9.3)   |
| <b>Skin and subcutaneous tissue disorders</b>           |            |            |            |
| Alopecia                                                | 52 (14.1)  | 119 (31.4) | 171 (22.8) |
| <b>Respiratory, thoracic, and mediastinal disorders</b> |            |            |            |
| Dyspnoea                                                | 25 (6.8)   | 47 (12.4)  | 72 (9.6)   |

|           |          |           |          |
|-----------|----------|-----------|----------|
| Epistaxis | 14 (3.8) | 43 (11.3) | 57 (7.6) |
|-----------|----------|-----------|----------|

NALIRIFOX, liposomal irinotecan in combination with 5-fluorouracil, leucovorin, and oxaliplatin; TEAE, treatment-emergent adverse event.

\*TEAEs are adverse events that occurred or worsened on or after the day of the first dose of study medication and within the 30 days after discontinuation of treatment.

Patients with multiple adverse events within a preferred term are only counted once under each category.

**Table S7 (online only). Grade  $\geq 3$  treatment-emergent adverse events occurring in  $\geq 2\%$  of patients in either treatment arm (safety population).**

| TEAE* — No. (%)                                             | NALIRIFOX<br>(n=370) | Nab-paclitaxel +<br>gemcitabine<br>(n=379) | All patients<br>(n=749) |
|-------------------------------------------------------------|----------------------|--------------------------------------------|-------------------------|
| <b>Gastrointestinal disorders</b>                           |                      |                                            |                         |
| Diarrhoea                                                   | 75 (20.3)            | 17 (4.5)                                   | 92 (12.3)               |
| Nausea                                                      | 44 (11.9)            | 10 (2.6)                                   | 54 (7.2)                |
| Vomiting                                                    | 26 (7.0)             | 8 (2.1)                                    | 34 (4.5)                |
| Constipation                                                | 3 (0.8)              | 8 (2.1)                                    | 11 (1.5)                |
| Abdominal pain                                              | 16 (4.3)             | 14 (3.7)                                   | 30 (4.0)                |
| Ascites                                                     | 11 (3.0)             | 8 (2.1)                                    | 19 (2.5)                |
| <b>General disorders and administration site conditions</b> |                      |                                            |                         |
| Fatigue                                                     | 23 (6.2)             | 20 (5.3)                                   | 43 (5.7)                |
| Asthenia                                                    | 33 (8.9)             | 19 (5.0)                                   | 52 (6.9)                |
| Mucosal inflammation                                        | 8 (2.2)              | 1 (0.3)                                    | 9 (1.2)                 |
| <b>Nervous system disorders</b>                             |                      |                                            |                         |
| Neuropathy peripheral                                       | 12 (3.2)             | 22 (5.8)                                   | 34 (4.5)                |
| Peripheral sensory neuropathy                               | 13 (3.5)             | 11 (2.9)                                   | 24 (3.2)                |
| <b>Blood and lymphatic system disorders</b>                 |                      |                                            |                         |
| Anaemia                                                     | 39 (10.5)            | 66 (17.4)                                  | 105 (14.0)              |
| Neutropenia                                                 | 52 (14.1)            | 93 (24.5)                                  | 145 (19.4)              |



|                                           |           |           |           |
|-------------------------------------------|-----------|-----------|-----------|
| Thrombocytopenia                          | 3 (0-8)   | 14 (3-7)  | 17 (2-3)  |
| Leukopenia                                | 4 (1-1)   | 17 (4-5)  | 21 (2-8)  |
| Febrile neutropenia                       | 9 (2-4)   | 9 (2-4)   | 18 (2-4)  |
| <b>Metabolism and nutrition disorders</b> |           |           |           |
| Decreased appetite                        | 32 (8-6)  | 10 (2-6)  | 42 (5-6)  |
| Hypokalaemia                              | 56 (15-1) | 15 (4-0)  | 71 (9-5)  |
| Dehydration                               | 12 (3-2)  | 4 (1-1)   | 16 (2-1)  |
| <b>Investigations</b>                     |           |           |           |
| Neutrophil count decreased                | 36 (9-7)  | 51 (13-5) | 87 (11-6) |
| Weight decreased                          | 11 (3-0)  | 1 (0-3)   | 12 (1-6)  |
| Platelet count decreased                  | 3 (0-8)   | 9 (2-4)   | 12 (1-6)  |
| Alanine aminotransferase increased        | 13 (3-5)  | 12 (3-2)  | 25 (3-3)  |
| Aspartate aminotransferase increased      | 11 (3-0)  | 8 (2-1)   | 19 (2-5)  |
| $\gamma$ -Glutamyltransferase increased   | 23 (6-2)  | 21 (5-5)  | 44 (5-9)  |
| Blood alkaline phosphatase increased      | 11 (3-0)  | 10 (2-6)  | 21 (2-8)  |
| White blood cell count decreased          | 6 (1-6)   | 18 (4-7)  | 24 (3-2)  |
| Blood bilirubin increased                 | 14 (3-8)  | 11 (2-9)  | 25 (3-3)  |
| <b>Infections and infestations</b>        |           |           |           |
| Pneumonia                                 | 5 (1-4)   | 13 (3-4)  | 18 (2-4)  |
| Sepsis                                    | 4 (1-1)   | 9 (2-4)   | 13 (1-7)  |

| <b>Respiratory, thoracic, and mediastinal disorders</b> |          |          |          |
|---------------------------------------------------------|----------|----------|----------|
| Dyspnoea                                                | 2 (0.5)  | 8 (2.1)  | 10 (1.3) |
| Pulmonary embolism                                      | 21 (5.7) | 17 (4.5) | 38 (5.1) |
| <b>Vascular disorders</b>                               |          |          |          |
| Hypertension                                            | 13 (3.5) | 8 (2.1)  | 21 (2.8) |
| <b>Renal and urinary disorders</b>                      |          |          |          |
| Acute kidney injury                                     | 4 (1.1)  | 10 (2.6) | 14 (1.9) |

NALIRIFOX, liposomal irinotecan in combination with 5-fluorouracil, leucovorin, and oxaliplatin; TEAE, treatment-emergent adverse event.

\*TEAEs are adverse events that occurred or worsened on or after the day of the first dose of study medication and within the 30 days after discontinuation of treatment. Patients with multiple adverse events within a preferred term are only counted once under each category.

**Table S8 (online only). Serious treatment-emergent adverse events of any grade occurring in patients in either treatment arm (safety population).**

| TEAE* — No. (%)                    | NALIRIFOX<br>(n=370) | Nab-paclitaxel +<br>gemcitabine<br>(n=379) | All patients<br>(n=749) |
|------------------------------------|----------------------|--------------------------------------------|-------------------------|
| <b>Gastrointestinal disorders</b>  |                      |                                            |                         |
| Diarrhoea                          | 23 (6.2)             | 9 (2.4)                                    | 32 (4.3)                |
| Vomiting                           | 22 (5.9)             | 6 (1.6)                                    | 28 (3.7)                |
| Nausea                             | 18 (4.9)             | 3 (0.8)                                    | 21 (2.8)                |
| Abdominal pain                     | 9 (2.4)              | 8 (2.1)                                    | 17 (2.3)                |
| Ascites                            | 6 (1.6)              | 5 (1.3)                                    | 11 (1.5)                |
| Colitis                            | 7 (1.9)              | 4 (1.1)                                    | 11 (1.5)                |
| Constipation                       | 1 (0.3)              | 6 (1.6)                                    | 7 (0.9)                 |
| Gastrointestinal haemorrhage       | 3 (0.8)              | 4 (1.1)                                    | 7 (0.9)                 |
| Intestinal obstruction             | 3 (0.8)              | 2 (0.5)                                    | 5 (0.7)                 |
| Ileus                              | 3 (0.8)              | 1 (0.3)                                    | 4 (0.5)                 |
| Upper gastrointestinal haemorrhage | 1 (0.3)              | 3 (0.8)                                    | 4 (0.5)                 |
| Duodenal obstruction               | 2 (0.5)              | 1 (0.3)                                    | 3 (0.4)                 |
| Duodenal stenosis                  | 2 (0.5)              | 1 (0.3)                                    | 3 (0.4)                 |
| Duodenal ulcer                     | 3 (0.8)              | 0 (0.0)                                    | 3 (0.4)                 |
| Small intestinal obstruction       | 1 (0.3)              | 2 (0.5)                                    | 3 (0.4)                 |
| Gastric haemorrhage                | 1 (0.3)              | 1 (0.3)                                    | 2 (0.3)                 |

|                               |         |         |         |
|-------------------------------|---------|---------|---------|
| Gastrointestinal toxicity     | 2 (0-5) | 0 (0-0) | 2 (0-3) |
| Haematemesis                  | 2 (0-5) | 0 (0-0) | 2 (0-3) |
| Obstruction gastric           | 1 (0-3) | 1 (0-3) | 2 (0-3) |
| Oesophagitis                  | 2 (0-5) | 0 (0-0) | 2 (0-3) |
| Pancreatitis acute            | 0 (0-0) | 2 (0-5) | 2 (0-3) |
| Abdominal discomfort          | 0 (0-0) | 1 (0-3) | 1 (0-1) |
| Abdominal pain upper          | 1 (0-3) | 0 (0-0) | 1 (0-1) |
| Diarrhoea haemorrhagic        | 0 (0-0) | 1 (0-3) | 1 (0-1) |
| Duodenal ulcer perforation    | 1 (0-3) | 0 (0-0) | 1 (0-1) |
| Dysphagia                     | 0 (0-0) | 1 (0-3) | 1 (0-1) |
| Enterocolitis                 | 1 (0-3) | 0 (0-0) | 1 (0-1) |
| Faecaloma                     | 0 (0-0) | 1 (0-3) | 1 (0-1) |
| Food poisoning                | 0 (0-0) | 1 (0-3) | 1 (0-1) |
| Gastric fistula               | 0 (0-0) | 1 (0-3) | 1 (0-1) |
| Gastric ulcer haemorrhage     | 1 (0-3) | 0 (0-0) | 1 (0-1) |
| Gastrointestinal disorder     | 0 (0-0) | 1 (0-3) | 1 (0-1) |
| Intestinal pseudo-obstruction | 1 (0-3) | 0 (0-0) | 1 (0-1) |
| Mesenteric vein thrombosis    | 1 (0-3) | 0 (0-0) | 1 (0-1) |
| Neutropenic colitis           | 1 (0-3) | 0 (0-0) | 1 (0-1) |
| Odynophagia                   | 0 (0-0) | 1 (0-3) | 1 (0-1) |
| Oesophageal ulcer             | 0 (0-0) | 1 (0-3) | 1 (0-1) |

|                                    |          |          |          |
|------------------------------------|----------|----------|----------|
| Oesophageal varices haemorrhage    | 0 (0-0)  | 1 (0-3)  | 1 (0-1)  |
| Small intestinal haemorrhage       | 0 (0-0)  | 1 (0-3)  | 1 (0-1)  |
| Terminal ileitis                   | 1 (0-3)  | 0 (0-0)  | 1 (0-1)  |
| <b>Infections and infestations</b> |          |          |          |
| COVID-19                           | 18 (4-9) | 14 (3-7) | 32 (4-3) |
| Sepsis                             | 6 (1-6)  | 16 (4-2) | 22 (2-9) |
| Pneumonia                          | 7 (1-9)  | 13 (3-4) | 20 (2-7) |
| Urinary tract infection            | 3 (0-8)  | 4 (1-1)  | 7 (0-9)  |
| Asymptomatic COVID-19              | 0 (0-0)  | 3 (0-8)  | 3 (0-4)  |
| Biliary tract infection            | 2 (0-5)  | 1 (0-3)  | 3 (0-4)  |
| Cellulitis                         | 0 (0-0)  | 3 (0-8)  | 3 (0-4)  |
| Febrile infection                  | 1 (0-3)  | 2 (0-5)  | 3 (0-4)  |
| Gastroenteritis                    | 3 (0-8)  | 0 (0-0)  | 3 (0-4)  |
| Abdominal sepsis                   | 0 (0-0)  | 2 (0-5)  | 2 (0-3)  |
| Bacteraemia                        | 1 (0-3)  | 1 (0-3)  | 2 (0-3)  |
| Diverticulitis                     | 1(0-3)   | 1 (0-3)  | 2 (0-3)  |
| Erysipelas                         | 1 (0-3)  | 1 (0-3)  | 2 (0-3)  |
| Escherichia bacteraemia            | 1 (0-3)  | 1 (0-3)  | 2 (0-3)  |
| Septic shock                       | 1 (0-3)  | 1 (0-3)  | 2 (0-3)  |
| Suspected COVID-19                 | 0 (0-0)  | 2 (0-5)  | 2 (0-3)  |

|                               |         |         |         |
|-------------------------------|---------|---------|---------|
| Abdominal abscess             | 0 (0-0) | 1 (0-3) | 1 (0-1) |
| Anal abscess                  | 1 (0-3) | 0 (0-0) | 1 (0-1) |
| Atypical pneumonia            | 1 (0-3) | 0 (0-0) | 1 (0-1) |
| Bacterial sepsis              | 0 (0-0) | 1 (0-3) | 1 (0-1) |
| Biliary sepsis                | 0 (0-0) | 1 (0-3) | 1 (0-1) |
| COVID-19 pneumonia            | 0 (0-0) | 1 (0-3) | 1 (0-1) |
| Campylobacter colitis         | 1 (0-3) | 0 (0-0) | 1 (0-1) |
| Catheter site infection       | 0 (0-0) | 1 (0-3) | 1 (0-1) |
| Cholangitis infective         | 0 (0-0) | 1 (0-3) | 1 (0-1) |
| Clostridium difficile colitis | 1 (0-3) | 0 (0-0) | 1 (0-1) |
| Device related bacteraemia    | 0 (0-0) | 1 (0-3) | 1 (0-1) |
| Device related infection      | 0 (0-0) | 1 (0-3) | 1 (0-1) |
| Enterococcal infection        | 0 (0-0) | 1 (0-3) | 1 (0-1) |
| Gallbladder abscess           | 0 (0-0) | 1 (0-3) | 1 (0-1) |
| Gastroenteritis norovirus     | 1 (0-3) | 0 (0-0) | 1 (0-1) |
| Hepatic infection             | 0 (0-0) | 1 (0-3) | 1 (0-1) |
| Hepatitis E                   | 1 (0-3) | 0 (0-0) | 1 (0-1) |
| Implant site cellulitis       | 0 (0-0) | 1 (0-3) | 1 (0-1) |
| Infective spondylitis         | 0 (0-0) | 1 (0-3) | 1 (0-1) |
| Large intestine infection     | 1 (0-3) | 0 (0-0) | 1 (0-1) |
| Liver abscess                 | 1 (0-3) | 0 (0-0) | 1 (0-1) |

|                                                             |         |          |          |
|-------------------------------------------------------------|---------|----------|----------|
| Peritonitis bacterial                                       | 0 (0-0) | 1 (0-3)  | 1 (0-1)  |
| Pneumonia aspiration                                        | 0 (0-0) | 1 (0-3)  | 1 (0-1)  |
| Post procedural cellulitis                                  | 0 (0-0) | 1 (0-3)  | 1 (0-1)  |
| Staphylococcal bacteraemia                                  | 1 (0-3) | 0 (0-0)  | 1 (0-1)  |
| Streptococcal infection                                     | 1 (0-3) | 0 (0-0)  | 1 (0-1)  |
| <b>General disorders and administration site conditions</b> |         |          |          |
| Pyrexia                                                     | 8 (2-2) | 12 (3-2) | 20 (2-7) |
| Asthenia                                                    | 7 (1-9) | 2 (0-5)  | 9 (1-2)  |
| Fatigue                                                     | 7 (1-9) | 0 (0-0)  | 7 (0-9)  |
| General physical health deterioration                       | 1 (0-3) | 6 (1-6)  | 7 (0-9)  |
| Malaise                                                     | 3 (0-8) | 0 (0-0)  | 3 (0-4)  |
| Oedema peripheral                                           | 0 (0-0) | 3 (0-8)  | 3 (0-4)  |
| Mucosal inflammation                                        | 1 (0-3) | 1 (0-3)  | 2 (0-3)  |
| Peripheral swelling                                         | 0 (0-0) | 2 (0-5)  | 2 (0-3)  |
| Catheter site inflammation                                  | 0 (0-0) | 1 (0-3)  | 1 (0-1)  |
| Chest pain                                                  | 1 (0-3) | 0 (0-0)  | 1 (0-1)  |
| Condition aggravated                                        | 0 (0-0) | 1 (0-3)  | 1 (0-1)  |
| Generalised oedema                                          | 1 (0-3) | 0 (0-0)  | 1 (0-1)  |
| Inadequate analgesia                                        | 0 (0-0) | 1 (0-3)  | 1 (0-1)  |
| Inflammation                                                | 1 (0-3) | 0 (0-0)  | 1 (0-1)  |

|                                           |          |         |          |
|-------------------------------------------|----------|---------|----------|
| Multiple organ dysfunction syndrome       | 1 (0-3)  | 0 (0-0) | 1 (0-1)  |
| Pain                                      | 1 (0-3)  | 0 (0-0) | 1 (0-1)  |
| Performance status decreased              | 0 (0-0)  | 1 (0-3) | 1 (0-1)  |
| Sudden cardiac death                      | 1 (0-3)  | 0 (0-0) | 1 (0-1)  |
| Sudden death                              | 1 (0-3)  | 0 (0-0) | 1 (0-1)  |
| <b>Metabolism and nutrition disorders</b> |          |         |          |
| Dehydration                               | 10 (2-7) | 4 (1-1) | 14 (1-9) |
| Hypokalaemia                              | 6 (1-6)  | 3 (0-8) | 9 (1-2)  |
| Decreased appetite                        | 5 (1-4)  | 2 (0-5) | 7 (0-9)  |
| Hypoglycaemia                             | 1 (0-3)  | 4 (1-1) | 5 (0-7)  |
| Hyponatraemia                             | 1 (0-3)  | 2 (0-5) | 3 (0-4)  |
| Adult failure to thrive                   | 0 (0-0)  | 2 (0-5) | 2 (0-3)  |
| Failure to thrive                         | 0 (0-0)  | 2 (0-5) | 2 (0-3)  |
| Hypophosphataemia                         | 1 (0-3)  | 1 (0-3) | 2 (0-3)  |
| Diabetes mellitus inadequate control      | 0 (0-0)  | 1 (0-3) | 1 (0-1)  |
| Diabetic metabolic decompensation         | 1 (0-3)  | 0 (0-0) | 1 (0-1)  |
| Electrolyte imbalance                     | 1 (0-3)  | 0 (0-0) | 1 (0-1)  |
| Hypercalcaemia                            | 1 (0-3)  | 0 (0-0) | 1 (0-1)  |
| Hyperkalaemia                             | 0 (0-0)  | 1 (0-3) | 1 (0-1)  |
| Type 2 diabetes mellitus                  | 1 (0-3)  | 0 (0-0) | 1 (0-1)  |



| <b>Respiratory, thoracic and mediastinal disorders</b> |          |         |          |
|--------------------------------------------------------|----------|---------|----------|
| Pulmonary embolism                                     | 10 (2-7) | 7 (1-8) | 17 (2-3) |
| Dyspnoea                                               | 2 (0-5)  | 5 (1-3) | 7 (0-9)  |
| Pleural effusion                                       | 2 (0-5)  | 2 (0-5) | 4 (0-5)  |
| Pneumonitis                                            | 0 (0-0)  | 2 (0-5) | 2 (0-3)  |
| Pneumothorax                                           | 1 (0-3)  | 1 (0-3) | 2 (0-3)  |
| Acute respiratory failure                              | 0 (0-0)  | 1 (0-3) | 1 (0-1)  |
| Aspiration                                             | 1 (0-3)  | 0 (0-0) | 1 (0-1)  |
| Hydrothorax                                            | 1 (0-3)  | 0 (0-0) | 1 (0-1)  |
| Hypoxia                                                | 0 (0-0)  | 1 (0-3) | 1 (0-1)  |
| Interstitial lung disease                              | 0 (0-0)  | 1 (0-3) | 1 (0-1)  |
| Lung infiltration                                      | 0 (0-0)  | 1 (0-3) | 1 (0-1)  |
| Pneumonitis aspiration                                 | 1 (0-3)  | 0 (0-0) | 1 (0-1)  |
| Productive cough                                       | 0 (0-0)  | 1 (0-3) | 1 (0-1)  |
| Pulmonary hypertension                                 | 0 (0-0)  | 1 (0-3) | 1 (0-1)  |
| Respiratory failure                                    | 0 (0-0)  | 1 (0-3) | 1 (0-1)  |
| <b>Blood and lymphatic system disorders</b>            |          |         |          |
| Anaemia                                                | 5 (1-4)  | 8 (2-1) | 13 (1-7) |
| Febrile neutropenia                                    | 7 (1-9)  | 6 (1-6) | 13 (1-7) |
| Neutropenia                                            | 2 (0-5)  | 1 (0-3) | 3 (0-4)  |

|                                        |         |         |          |
|----------------------------------------|---------|---------|----------|
| Pancytopenia                           | 1 (0-3) | 1 (0-3) | 2 (0-3)  |
| Thrombocytopenia                       | 0 (0-0) | 2 (0-5) | 2 (0-3)  |
| Disseminated intravascular coagulation | 0 (0-0) | 1 (0-3) | 1 (0-1)  |
| <b>Vascular disorders</b>              |         |         |          |
| Deep vein thrombosis                   | 4 (1-1) | 8 (2-1) | 12 (1-6) |
| Hypotension                            | 2 (0-5) | 3 (0-8) | 5 (0-7)  |
| Embolism                               | 1 (0-3) | 3 (0-8) | 4 (0-5)  |
| Haemorrhage                            | 0 (0-0) | 3 (0-8) | 3 (0-4)  |
| Peripheral ischaemia                   | 1 (0-3) | 1 (0-3) | 2 (0-3)  |
| Embolism arterial                      | 1 (0-3) | 0 (0-0) | 1 (0-1)  |
| Hypertension                           | 1 (0-3) | 0 (0-0) | 1 (0-1)  |
| Iliac vein occlusion                   | 0 (0-0) | 1 (0-3) | 1 (0-1)  |
| Orthostatic hypotension                | 0 (0-0) | 1 (0-3) | 1 (0-1)  |
| Peripheral embolism                    | 1 (0-3) | 0 (0-0) | 1 (0-1)  |
| Venous thrombosis limb                 | 0 (0-0) | 1 (0-3) | 1 (0-1)  |
| <b>Hepatobiliary disorders</b>         |         |         |          |
| Cholangitis                            | 4 (1-1) | 6 (1-6) | 10 (1-3) |
| Biliary obstruction                    | 6 (1-6) | 1 (0-3) | 7 (0-9)  |
| Cholestasis                            | 1 (0-3) | 2 (0-5) | 3 (0-4)  |
| Hyperbilirubinaemia                    | 2 (0-5) | 1 (0-3) | 3 (0-4)  |

|                                  |         |         |         |
|----------------------------------|---------|---------|---------|
| Cholecystitis                    | 0 (0-0) | 2 (0-5) | 2 (0-3) |
| Cholecystitis acute              | 0 (0-0) | 2 (0-5) | 2 (0-3) |
| Bile duct stenosis               | 0 (0-0) | 1 (0-3) | 1 (0-1) |
| Hepatitis                        | 0 (0-0) | 1 (0-3) | 1 (0-1) |
| Hepatitis toxic                  | 1 (0-3) | 0 (0-0) | 1 (0-1) |
| Hepatotoxicity                   | 1 (0-3) | 0 (0-0) | 1 (0-1) |
| Jaundice cholestatic             | 0 (0-0) | 1 (0-3) | 1 (0-1) |
| <b>Nervous system disorders</b>  |         |         |         |
| Cerebrovascular accident         | 4 (1-1) | 2 (0-5) | 6 (0-8) |
| Ischaemic stroke                 | 4 (1-1) | 2 (0-5) | 6 (0-8) |
| Cerebral haemorrhage             | 2 (0-5) | 0 (0-0) | 2 (0-3) |
| Cerebral ischaemia               | 2 (0-5) | 0 (0-0) | 2 (0-3) |
| Aphasia                          | 1 (0-3) | 0 (0-0) | 1 (0-1) |
| Cerebral infarction              | 0 (0-0) | 1 (0-3) | 1 (0-1) |
| Embolic stroke                   | 0 (0-0) | 1 (0-3) | 1 (0-1) |
| Epilepsy                         | 0 (0-0) | 1 (0-3) | 1 (0-1) |
| Generalised tonic-clonic seizure | 1 (0-3) | 0 (0-0) | 1 (0-1) |
| Hemiparesis                      | 0 (0-0) | 1 (0-3) | 1 (0-1) |
| Hypoaesthesia                    | 0 (0-0) | 1 (0-3) | 1 (0-1) |
| Metabolic encephalopathy         | 0 (0-0) | 1 (0-3) | 1 (0-1) |

|                                      |         |         |          |
|--------------------------------------|---------|---------|----------|
| Myoclonus                            | 0 (0-0) | 1 (0-3) | 1 (0-1)  |
| Pineal gland cyst                    | 1 (0-3) | 0 (0-0) | 1 (0-1)  |
| Sciatica                             | 0 (0-0) | 1 (0-3) | 1 (0-1)  |
| Seizure                              | 1 (0-3) | 0 (0-0) | 1 (0-1)  |
| Transient ischaemic attack           | 0 (0-0) | 1 (0-3) | 1 (0-1)  |
| Tremor                               | 1 (0-3) | 0 (0-0) | 1 (0-1)  |
| <b>Investigations</b>                |         |         |          |
| Blood bilirubin increased            | 5 (1-4) | 3 (0-8) | 8 (1-1)  |
| Neutrophil count decreased           | 2 (0-5) | 2 (0-5) | 4 (0-5)  |
| SARS-CoV-2 test positive             | 1 (0-3) | 2 (0-5) | 3 (0-4)  |
| Gamma-glutamyltransferase increased  | 2 (0-5) | 0 (0-0) | 2 (0-3)  |
| White blood cell count decreased     | 1 (0-3) | 1 (0-3) | 2 (0-3)  |
| Blood alkaline phosphatase increased | 1 (0-3) | 0 (0-0) | 1 (0-1)  |
| Blood glucose abnormal               | 1 (0-3) | 0 (0-0) | 1 (0-1)  |
| General physical condition abnormal  | 1 (0-3) | 0 (0-0) | 1 (0-1)  |
| Haemoglobin decreased                | 1 (0-3) | 0 (0-0) | 1 (0-1)  |
| Platelet count decreased             | 0 (0-0) | 1 (0-3) | 1 (0-1)  |
| <b>Renal and urinary disorders</b>   |         |         |          |
| Acute kidney injury                  | 3 (0-8) | 9 (2-4) | 12 (1-6) |
| Haematuria                           | 0 (0-0) | 3 (0-8) | 3 (0-4)  |

|                                                       |         |         |         |
|-------------------------------------------------------|---------|---------|---------|
| Renal impairment                                      | 1 (0-3) | 1 (0-3) | 2 (0-3) |
| Nephrolithiasis                                       | 0 (0-0) | 1 (0-3) | 1 (0-1) |
| Renal failure                                         | 1 (0-3) | 0 (0-0) | 1 (0-1) |
| Urinary retention                                     | 0 (0-0) | 1 (0-3) | 1 (0-1) |
| Urinary tract obstruction                             | 0 (0-0) | 1 (0-3) | 1 (0-1) |
| <b>Cardiac disorders</b>                              |         |         |         |
| Atrial fibrillation                                   | 0 (0-0) | 3 (0-8) | 3 (0-4) |
| Cardiac arrest                                        | 1 (0-3) | 1 (0-3) | 2 (0-3) |
| Cardiac failure                                       | 0 (0-0) | 2 (0-5) | 2 (0-3) |
| Acute myocardial infarction                           | 1 (0-3) | 0 (0-0) | 1 (0-1) |
| Angina pectoris                                       | 1 (0-3) | 0 (0-0) | 1 (0-1) |
| Arrhythmia                                            | 0 (0-0) | 1 (0-3) | 1 (0-1) |
| Atrial flutter                                        | 1 (0-3) | 0 (0-0) | 1 (0-1) |
| Cardiac failure chronic                               | 0 (0-0) | 1 (0-3) | 1 (0-1) |
| Cardiac flutter                                       | 0 (0-0) | 1 (0-3) | 1 (0-1) |
| Myocardial infarction                                 | 0 (0-0) | 1 (0-3) | 1 (0-1) |
| Sinus node dysfunction                                | 0 (0-0) | 1 (0-3) | 1 (0-1) |
| Tachycardia                                           | 1 (0-3) | 0 (0-0) | 1 (0-1) |
| <b>Injury, poisoning and procedural complications</b> |         |         |         |
| Exposure to SARS-CoV-2                                | 0 (0.0) | 4 (1.1) | 4 (0.5) |

|                                                                            |         |         |         |
|----------------------------------------------------------------------------|---------|---------|---------|
| Hip fracture                                                               | 1 (0-3) | 1 (0-3) | 2 (0-3) |
| Fall                                                                       | 1 (0-3) | 0 (0-0) | 1 (0-1) |
| Femoral neck fracture                                                      | 0 (0-0) | 1 (0-3) | 1 (0-1) |
| Head injury                                                                | 1 (0-3) | 0 (0-0) | 1 (0-1) |
| Wound                                                                      | 0 (0-0) | 1 (0-3) | 1 (0-1) |
| <b>Psychiatric disorders</b>                                               |         |         |         |
| Confusional state                                                          | 1 (0-3) | 2 (0-5) | 3 (0-4) |
| Mental status changes                                                      | 2 (0-5) | 0 (0-0) | 2 (0-3) |
| Anxiety                                                                    | 0 (0-0) | 1 (0-3) | 1 (0-1) |
| Delirium                                                                   | 1 (0-3) | 0 (0-0) | 1 (0-1) |
| Depression                                                                 | 1 (0-3) | 0 (0-0) | 1 (0-1) |
| Psychotic disorder                                                         | 0 (0-0) | 1 (0-3) | 1 (0-1) |
| <b>Musculoskeletal and connective tissue disorders</b>                     |         |         |         |
| Back pain                                                                  | 1 (0-3) | 1 (0-3) | 2 (0-3) |
| Chest wall haematoma                                                       | 0 (0-0) | 1 (0-3) | 1 (0-1) |
| Myalgia                                                                    | 0 (0-0) | 1 (0-3) | 1 (0-1) |
| Pain in extremity                                                          | 1 (0-3) | 0 (0-0) | 1 (0-1) |
| Pathological fracture                                                      | 0 (0-0) | 1 (0-3) | 1 (0-1) |
| <b>Neoplasms benign, malignant and unspecified (incl cysts and polyps)</b> |         |         |         |
| Tumour haemorrhage                                                         | 1 (0-3) | 1 (0-3) | 2 (0-3) |

|                                                 |         |         |         |
|-------------------------------------------------|---------|---------|---------|
| Peritumoural oedema                             | 1 (0-3) | 0 (0-0) | 1 (0-1) |
| Tumour pain                                     | 0 (0-0) | 1 (0-3) | 1 (0-1) |
| <b>Skin and subcutaneous tissue disorders</b>   |         |         |         |
| Decubitus ulcer                                 | 0 (0-0) | 1 (0-3) | 1 (0-1) |
| Erythema                                        | 0 (0-0) | 1 (0-3) | 1 (0-1) |
| Pruritus                                        | 0 (0-0) | 1 (0-3) | 1 (0-1) |
| Rash                                            | 0 (0-0) | 1 (0-3) | 1 (0-1) |
| <b>Ear and labyrinth disorders</b>              |         |         |         |
| Vertigo                                         | 2 (0-5) | 0 (0-0) | 2 (0-3) |
| <b>Reproductive system and breast disorders</b> |         |         |         |
| Penile vein thrombosis                          | 1 (0-3) | 0 (0-0) | 1 (0-1) |
| Priapism                                        | 1 (0-3) | 0 (0-0) | 1 (0-1) |
| <b>Eye disorders</b>                            |         |         |         |
| Retinal vein occlusion                          | 1 (0-3) | 0 (0-0) | 1 (0-1) |
| <b>Product issues</b>                           |         |         |         |
| Thrombosis in device                            | 1 (0-3) | 0 (0-0) | 1 (0-1) |

NALIRIFOX, liposomal irinotecan in combination with 5-fluorouracil, leucovorin, and oxaliplatin; TEAE, treatment-emergent adverse event.

\*TEAEs are adverse events that occurred or worsened on or after the day of the first dose of study medication and within the 30 days after discontinuation of treatment.

Patients with multiple adverse events within a preferred term are only counted once under each category.

## REFERENCES

1. Rainone M, Singh I, Salo-Mullen EE, Stadler ZK, O'Reilly EM. An emerging paradigm for germline testing in pancreatic ductal adenocarcinoma and immediate implications for clinical practice: a review. *JAMA Oncol.* 2020;**6**:764–771.
2. Cancer Genome Atlas Research Network. Integrated genomic characterization of pancreatic ductal adenocarcinoma. *Cancer Cell.* 2017;**32**:185–203.e13.
